# Supplementary material for: The genome of the zoonotic malaria parasite Plasmodium simium reveals adaptations to host switching
Source: PubMed Central journal article supplement (PMC8485552; doi:10.1186/s12915-021-01139-5), 2021-10-01

Figure S1

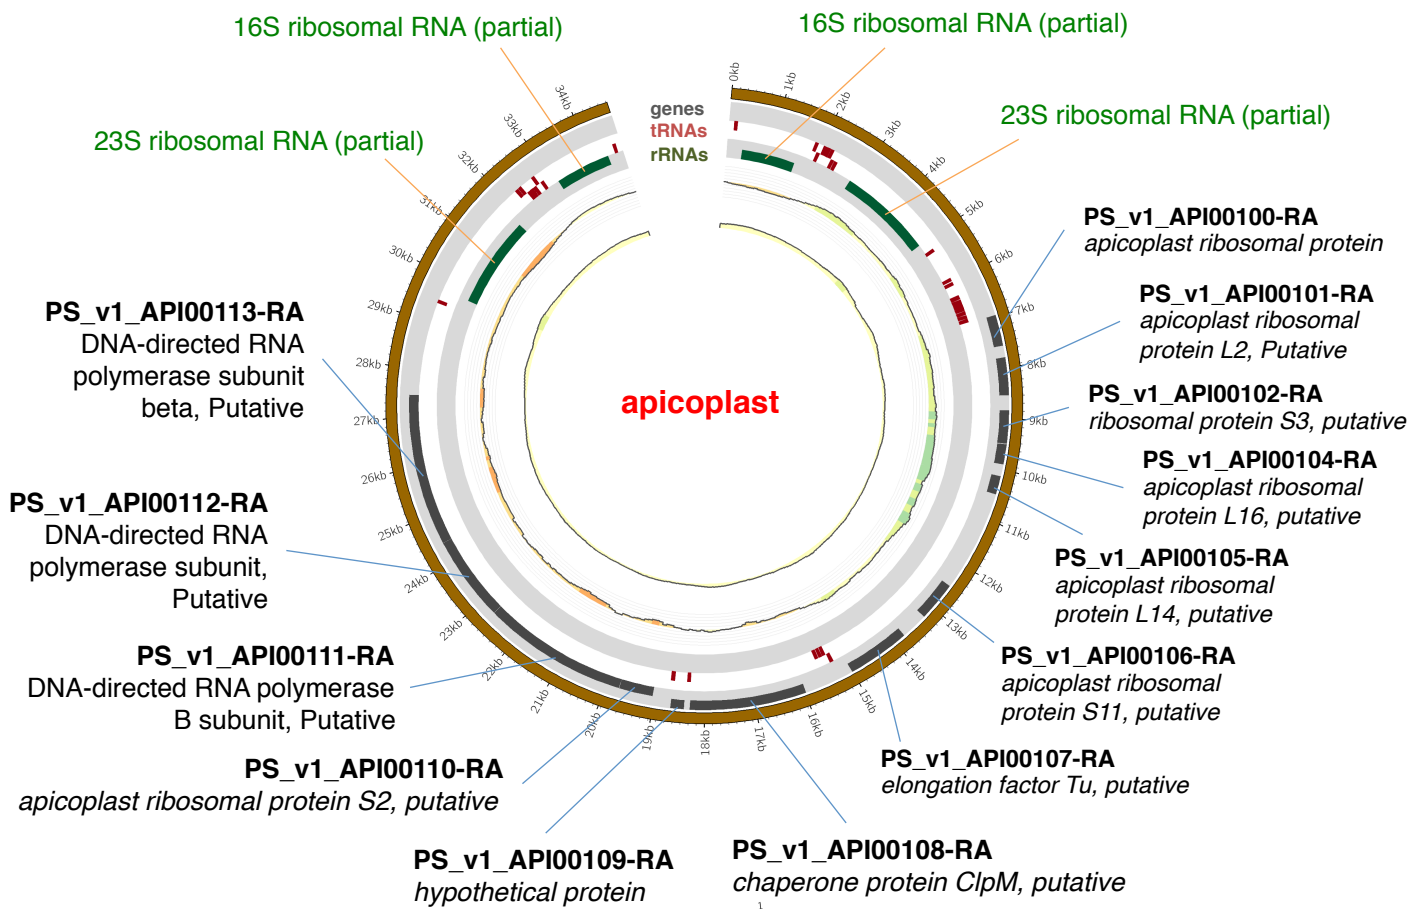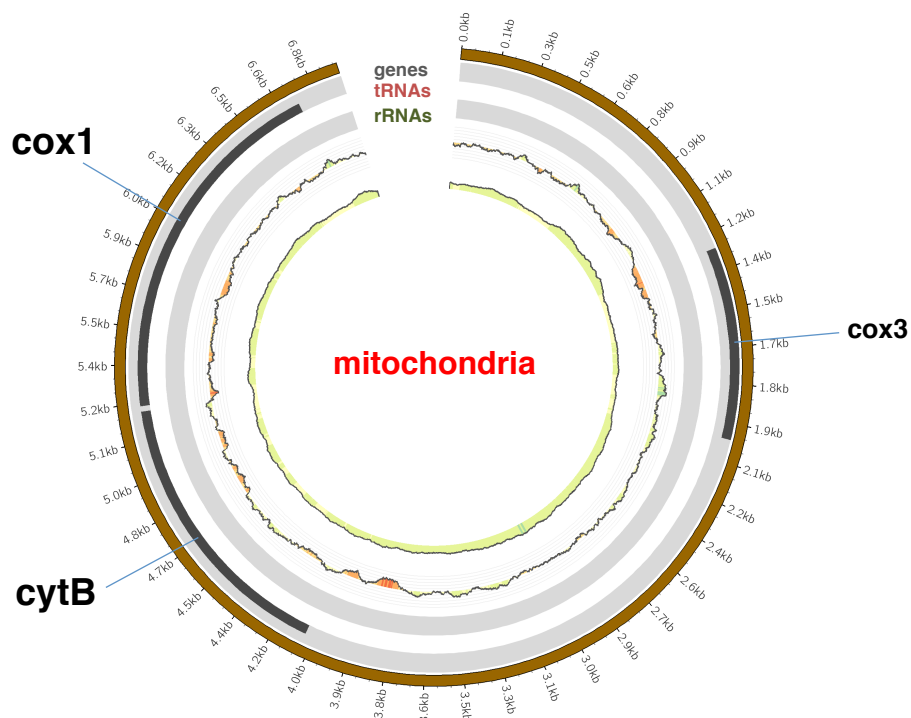

Figure S2

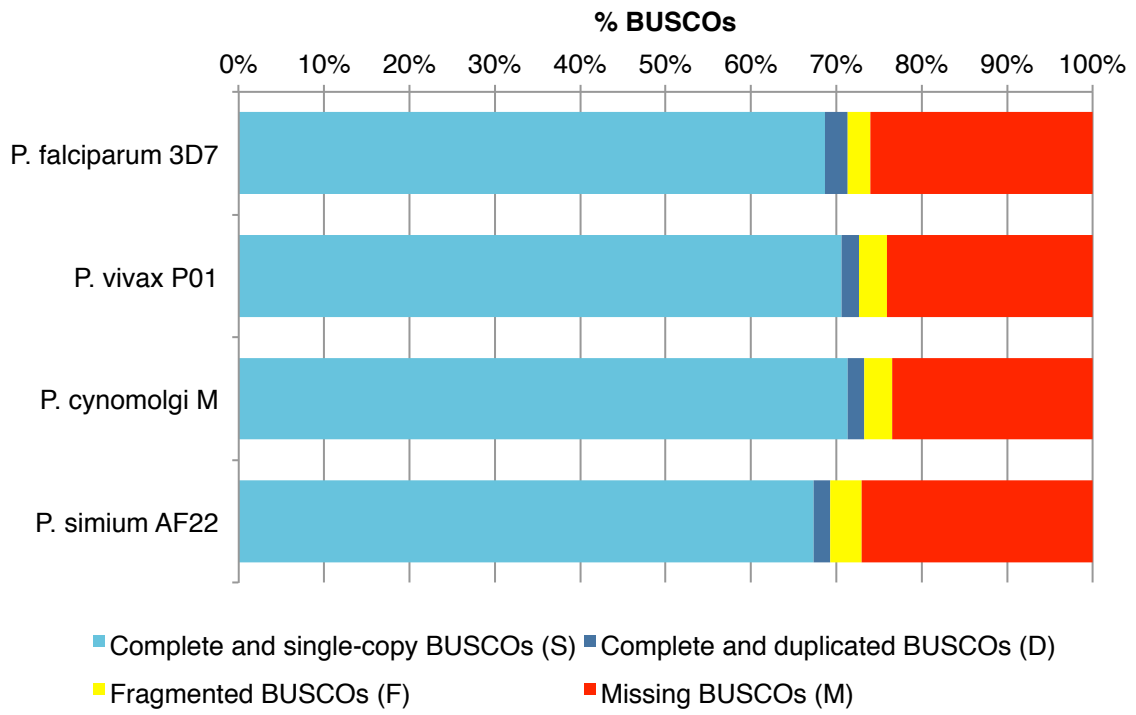

Figure S3

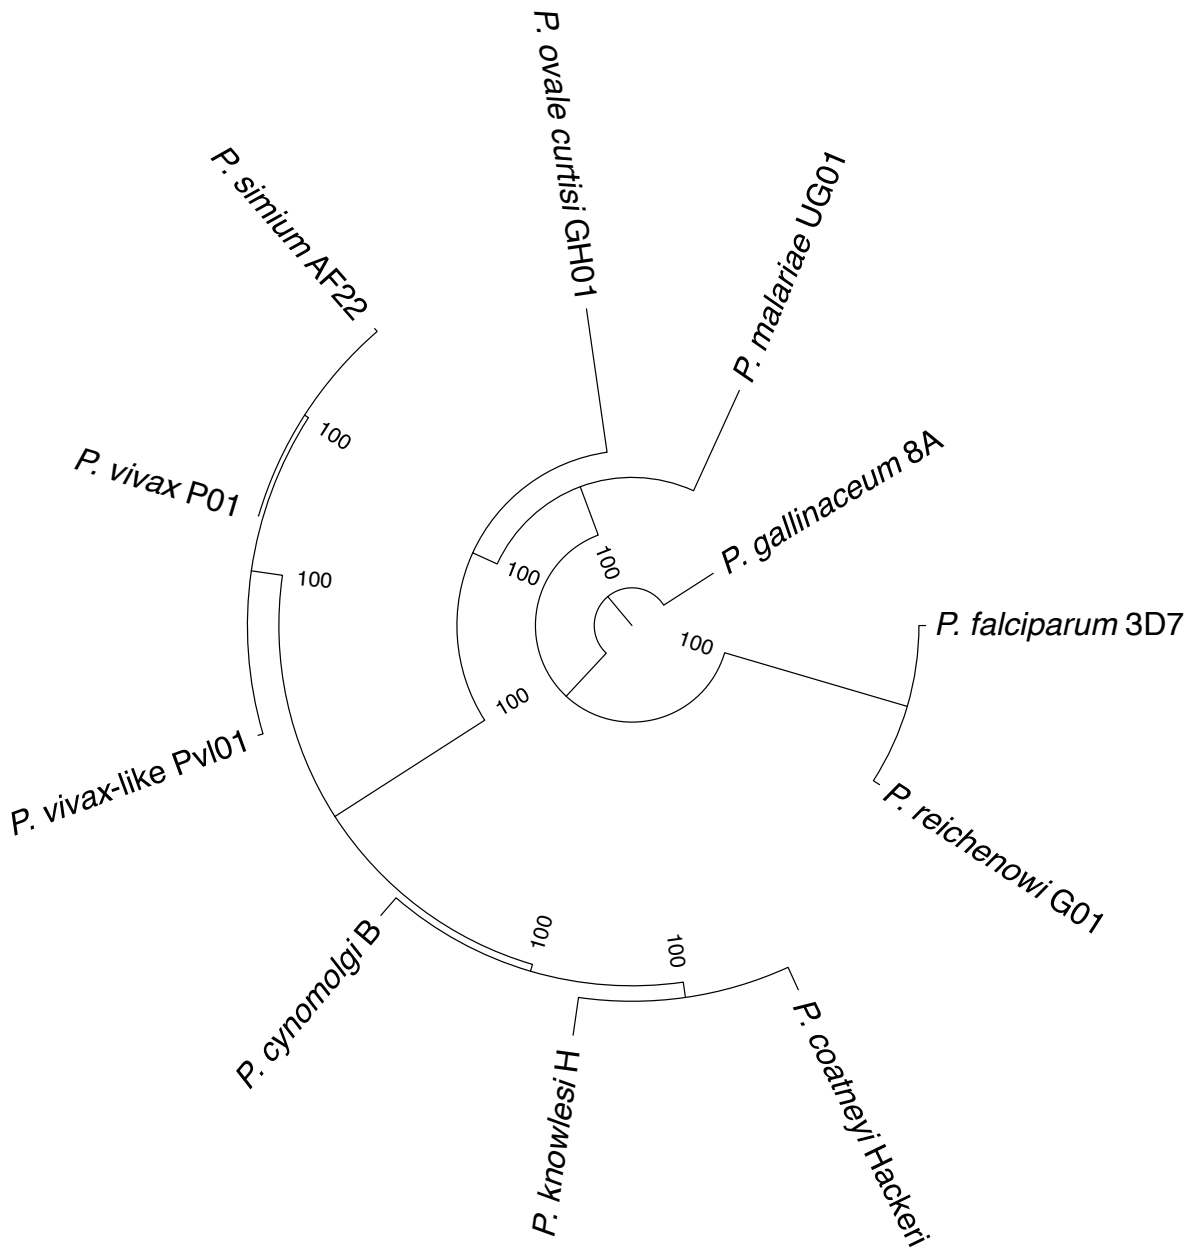

0.09

Figure S4

**A**

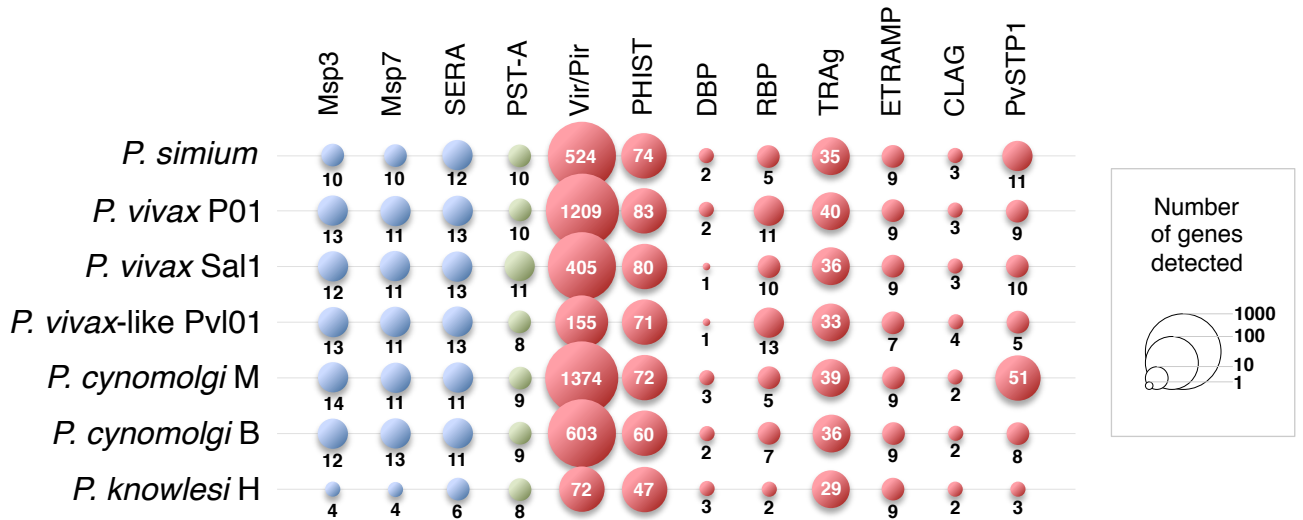

**B**

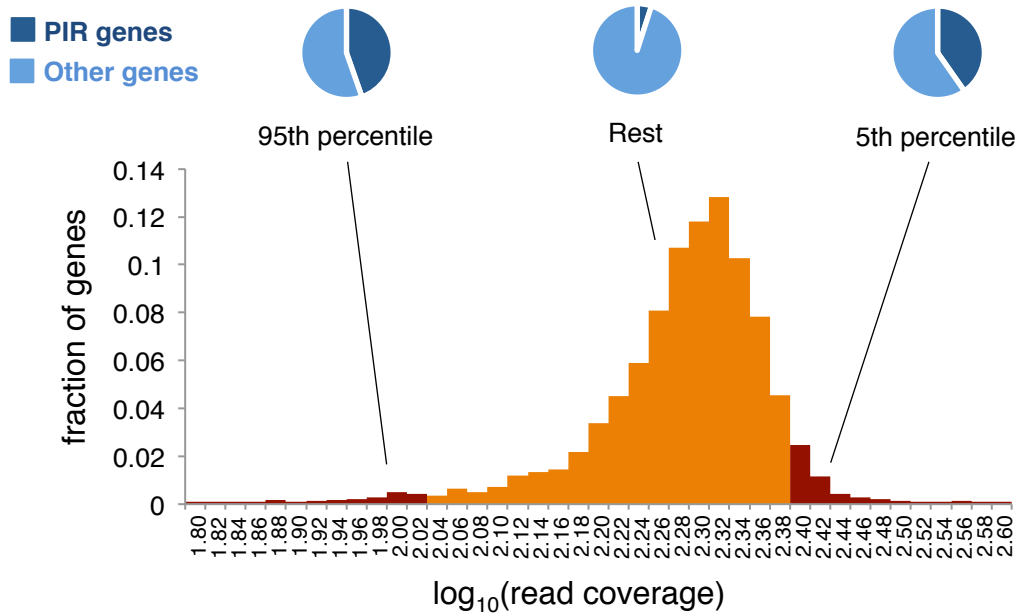

Figure S5

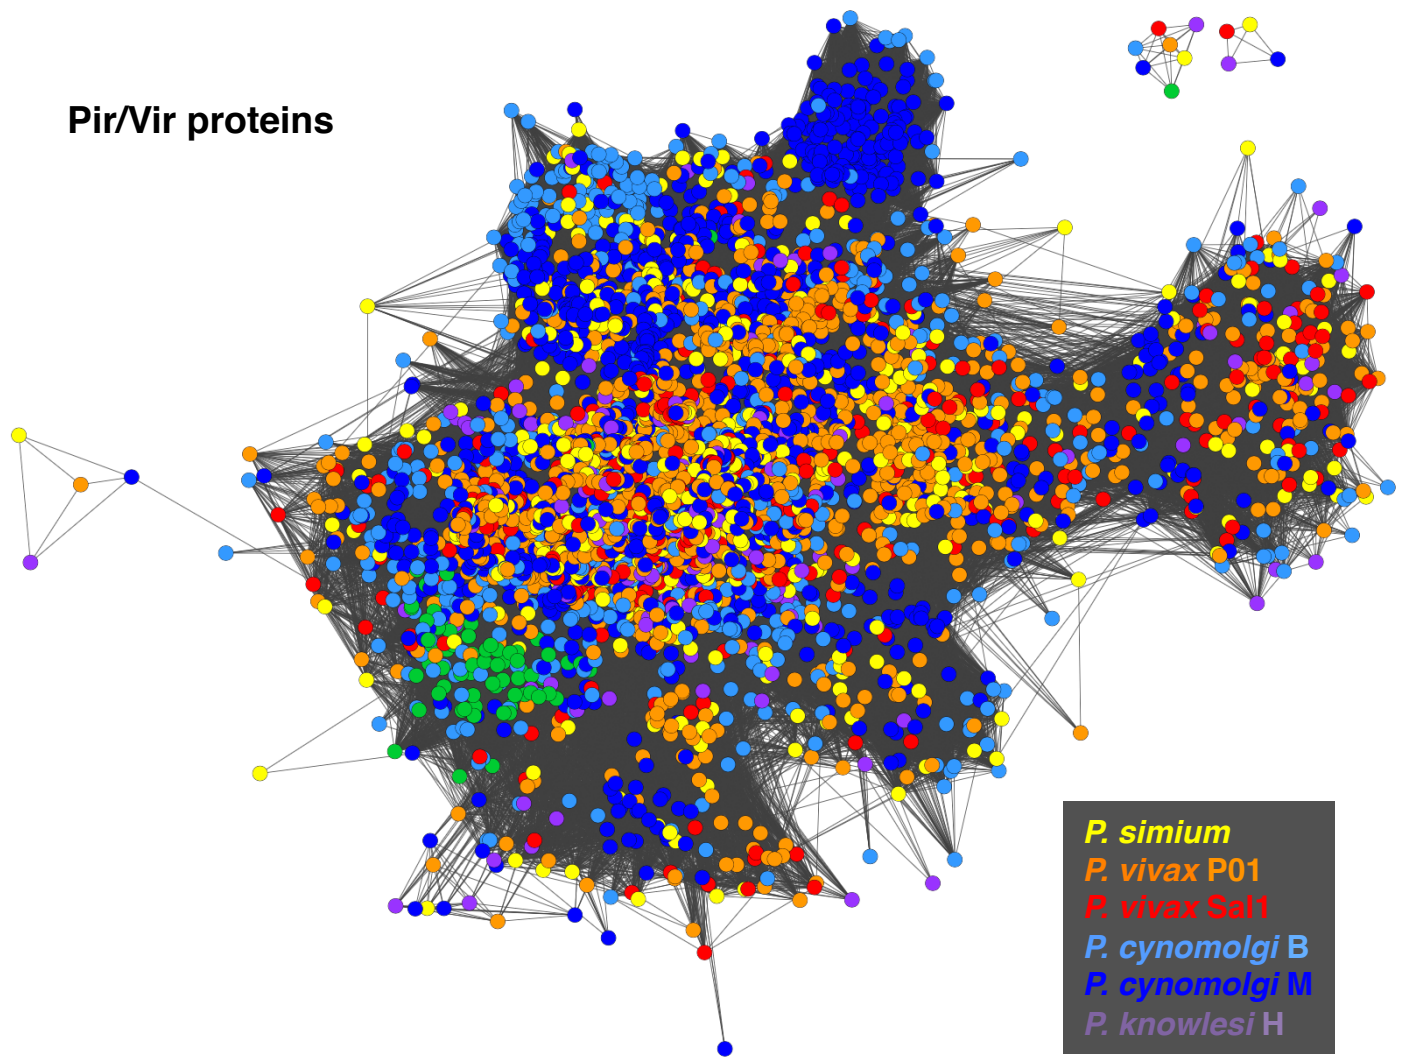

Figure S6

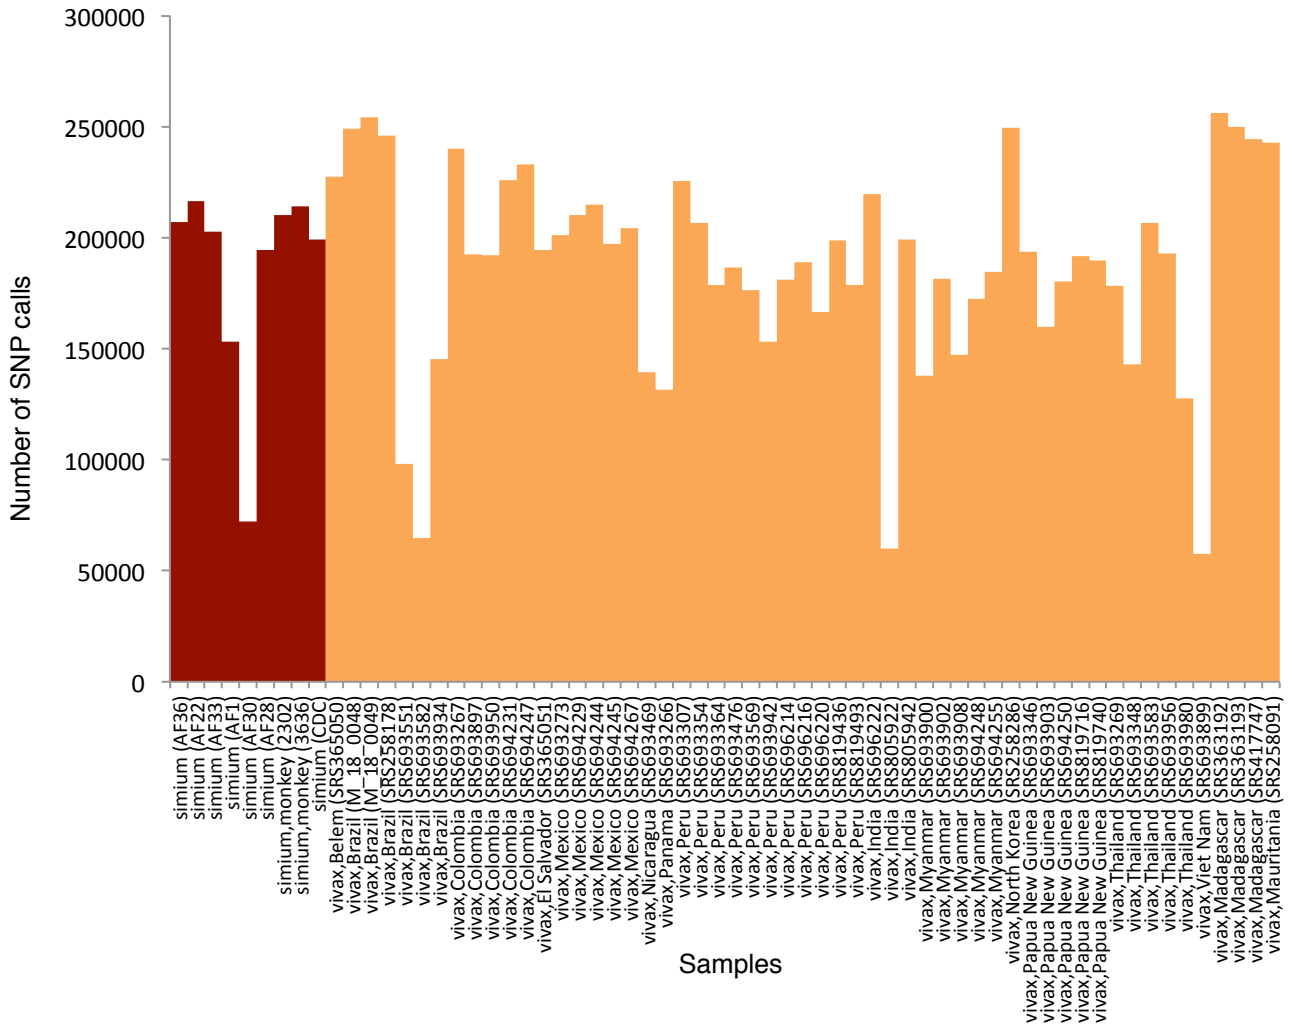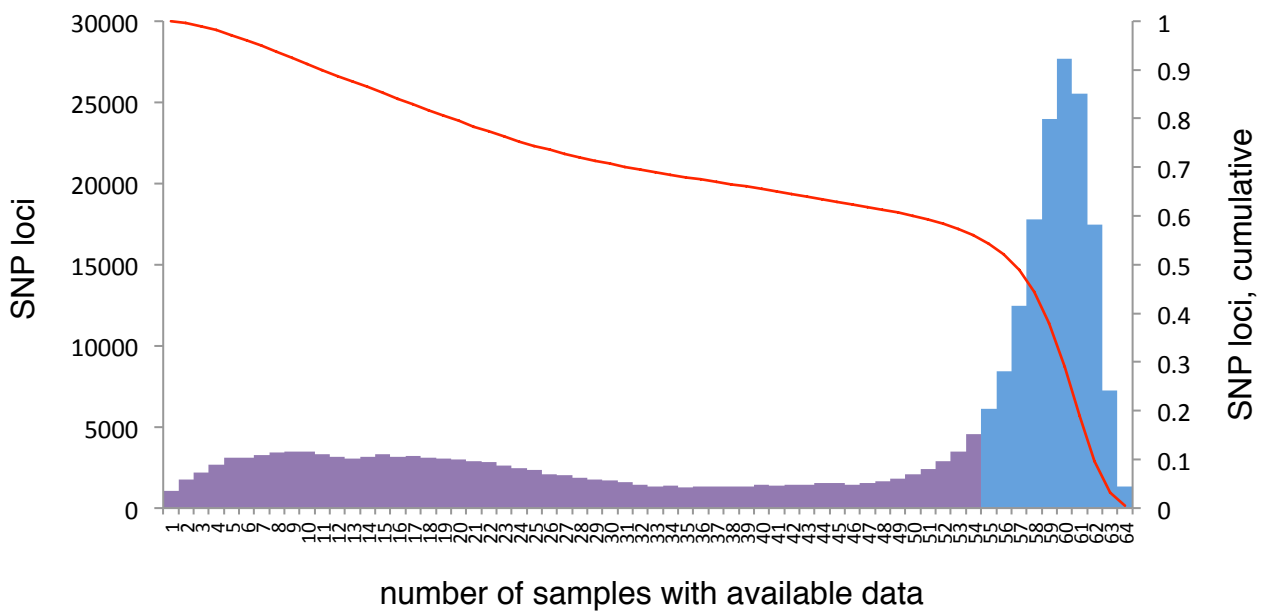

Figure S7

**A**

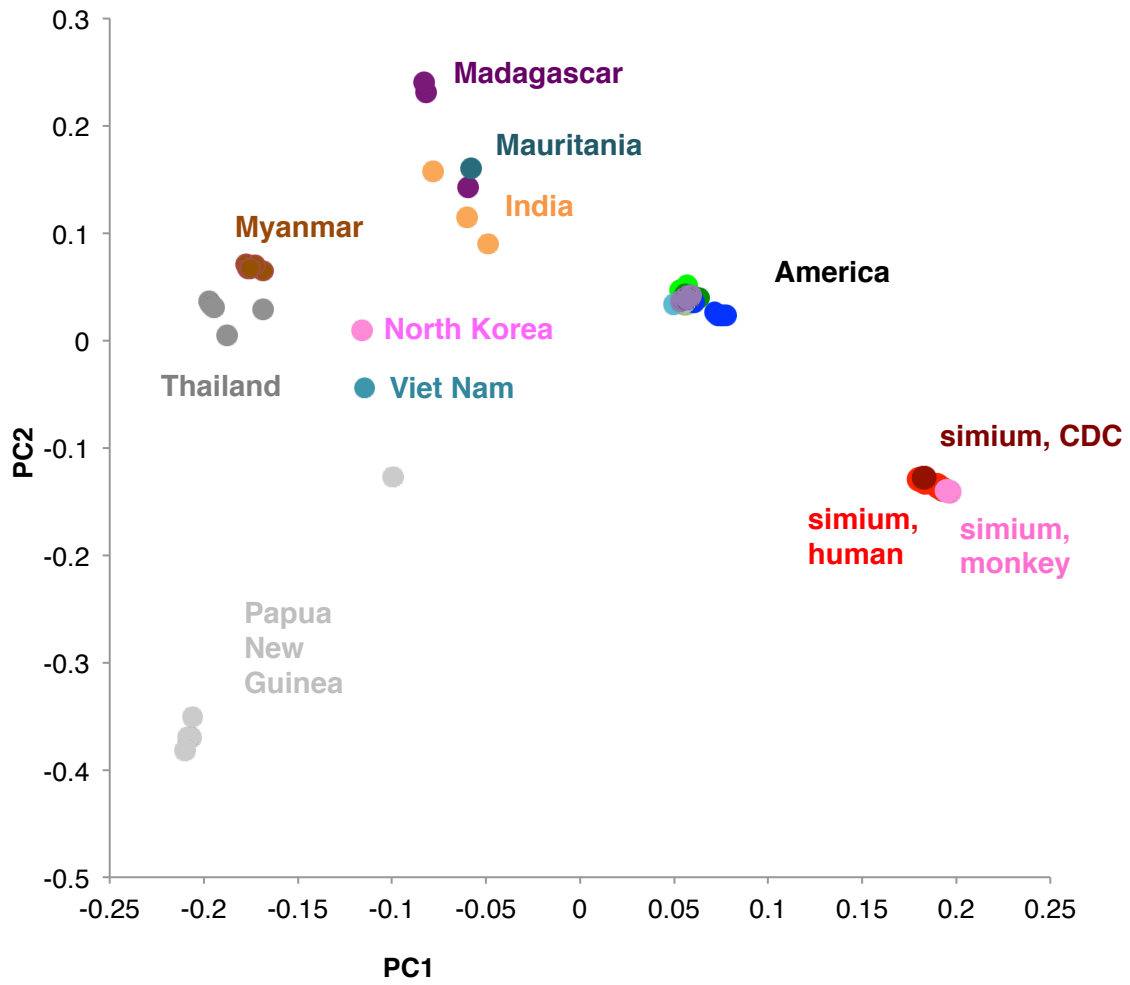

**B**

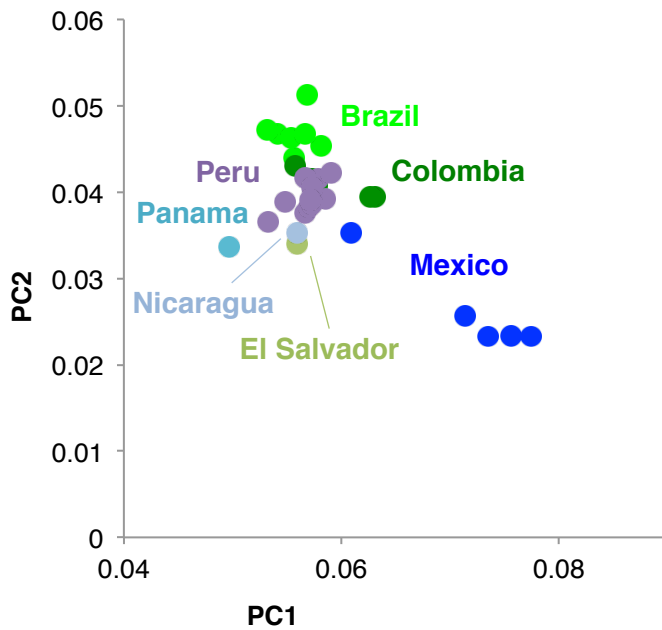

**C**

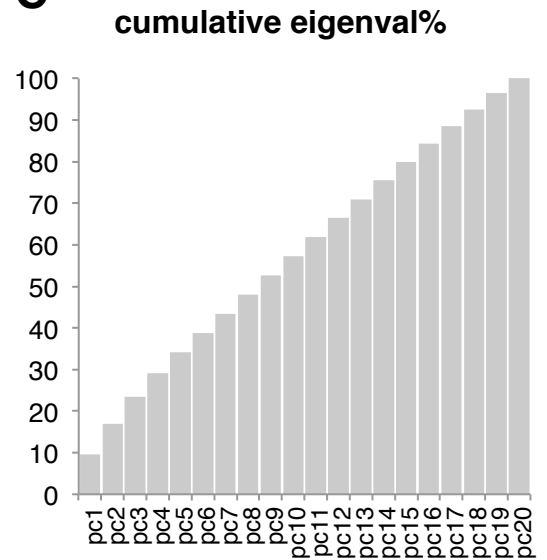

Figure S8

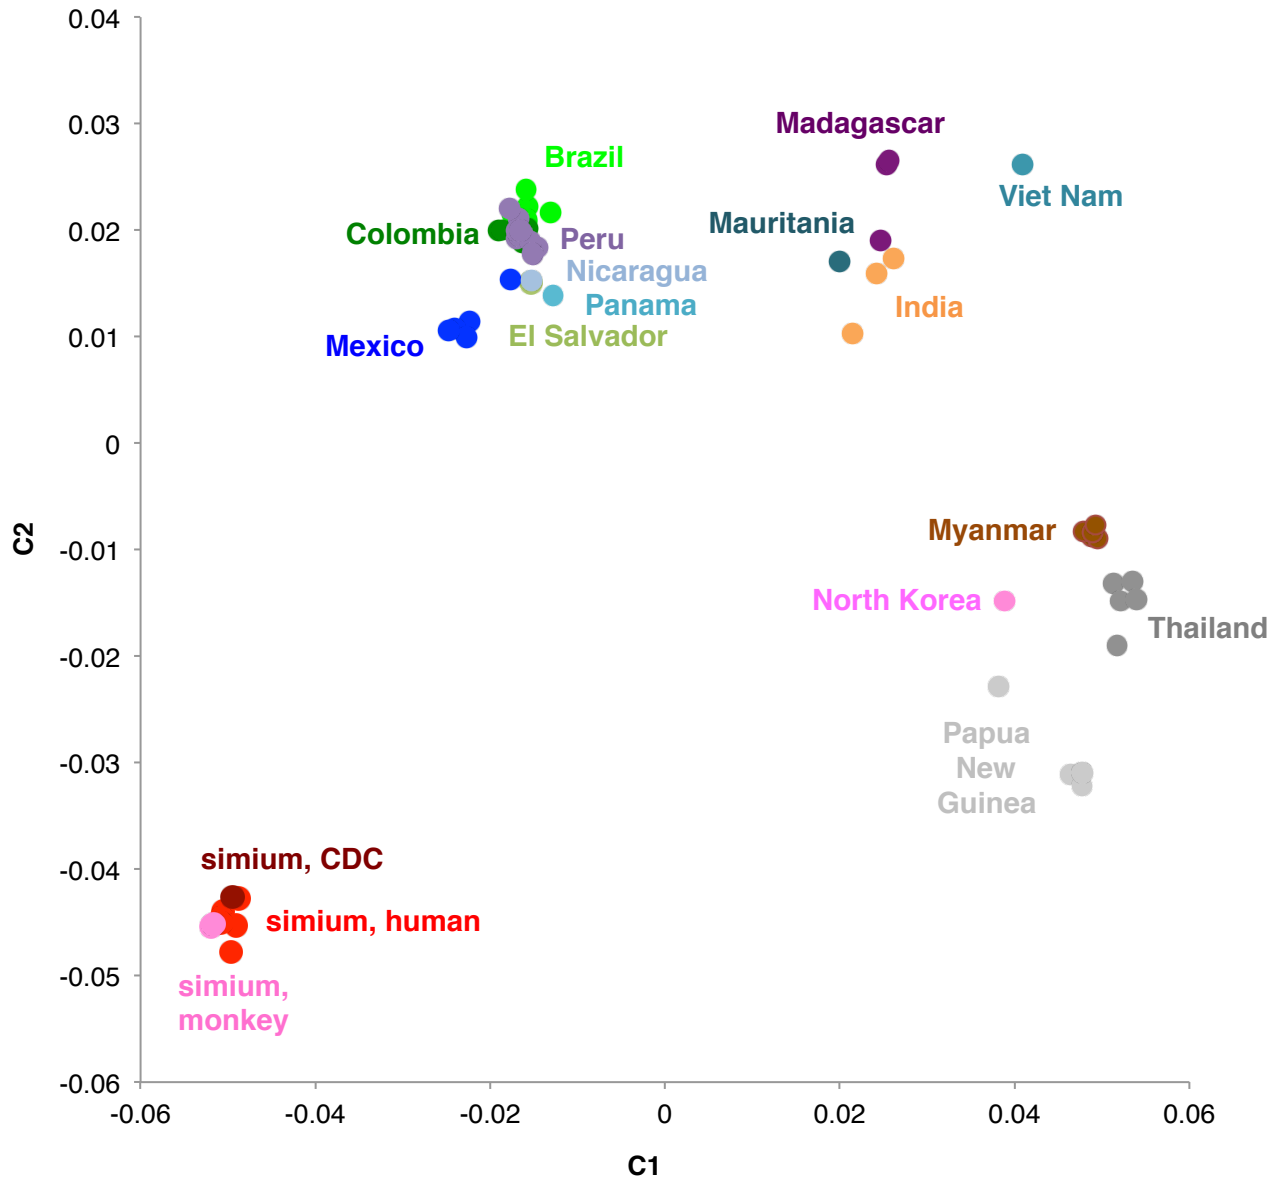



Figure S9

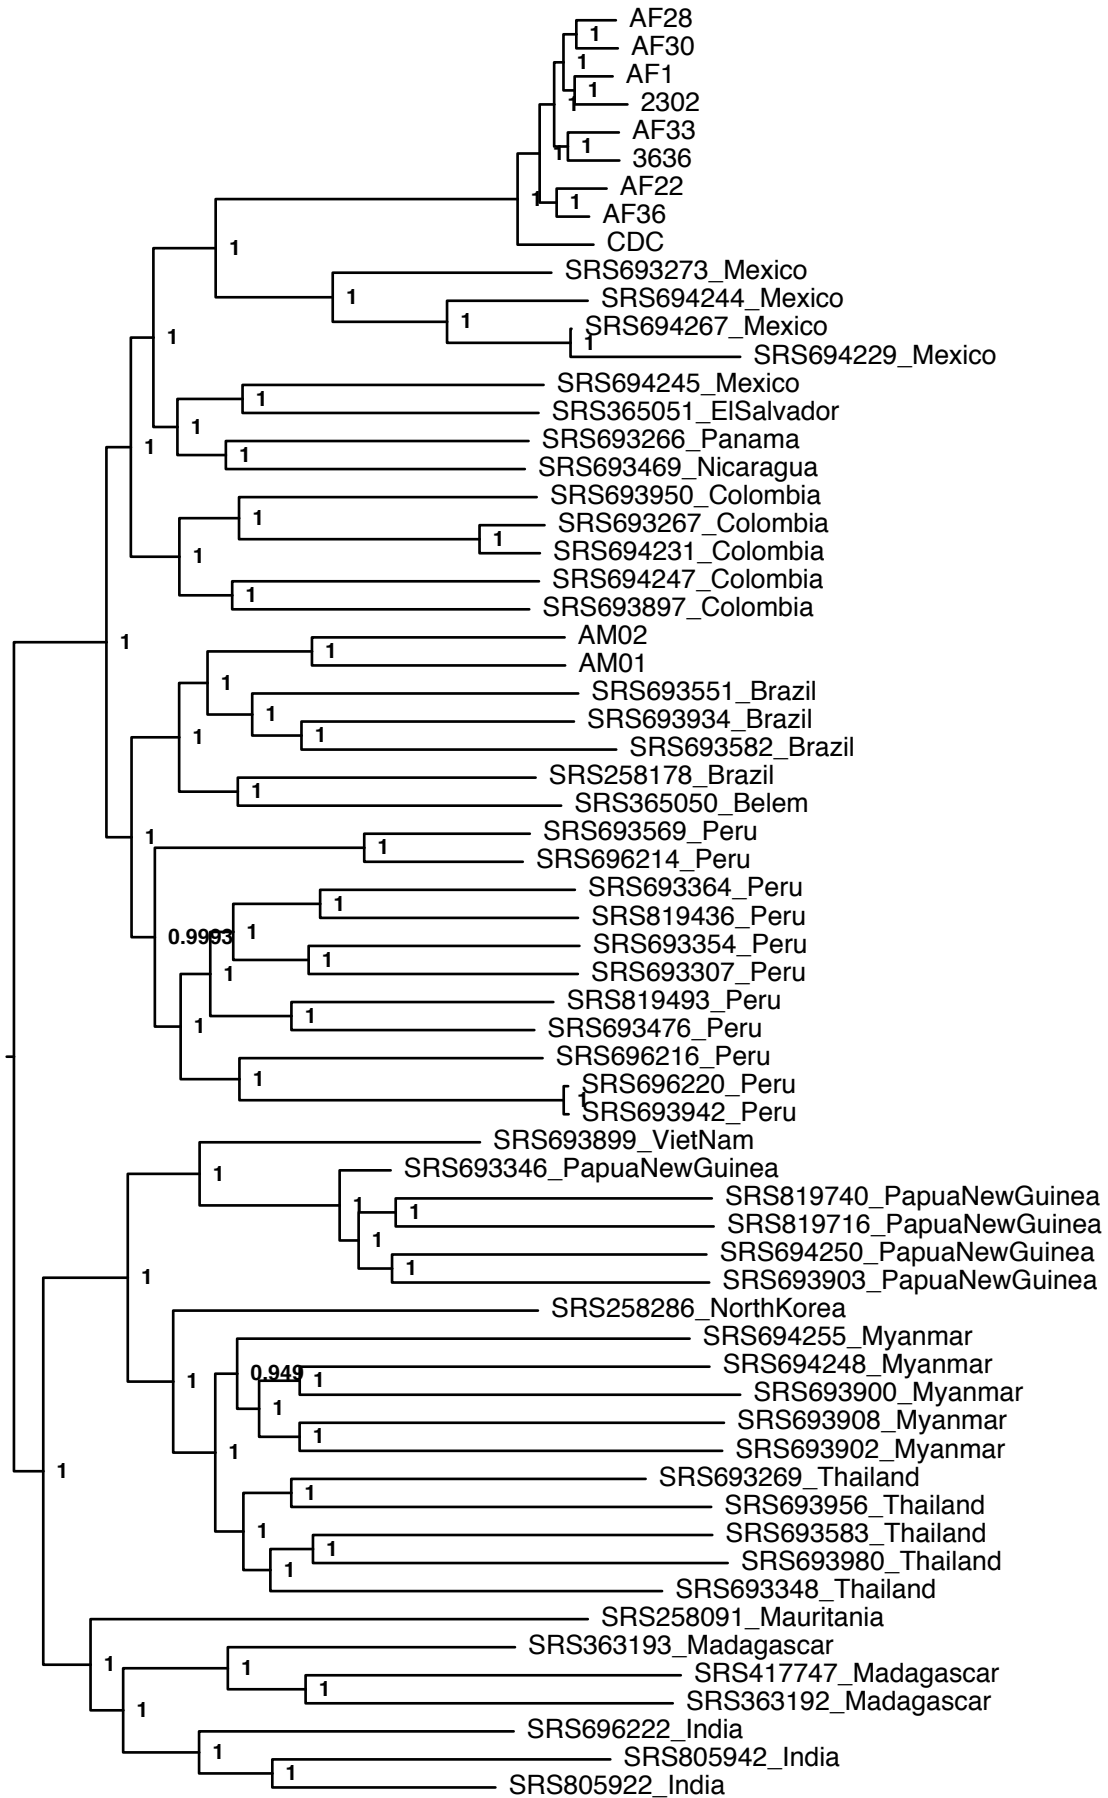

0.02

Figure S10

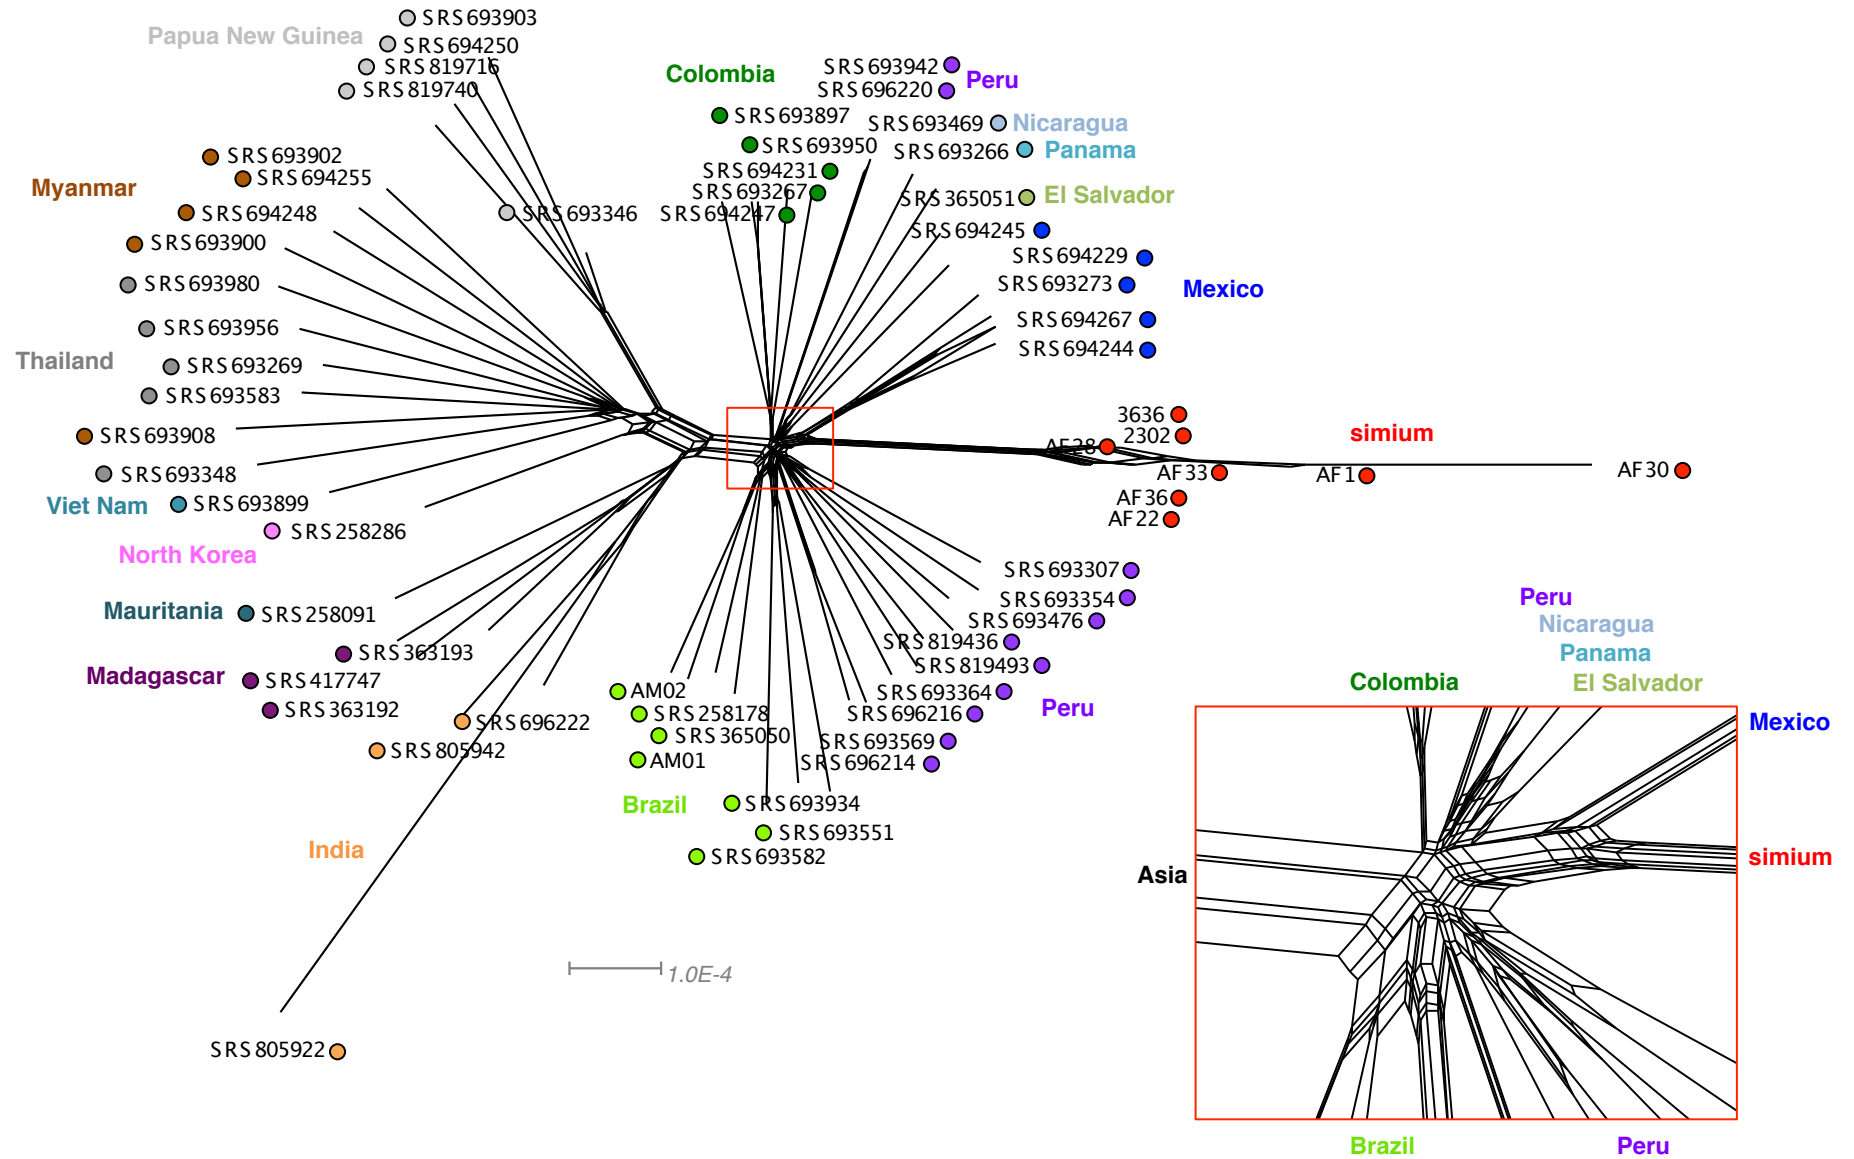



Figure S12

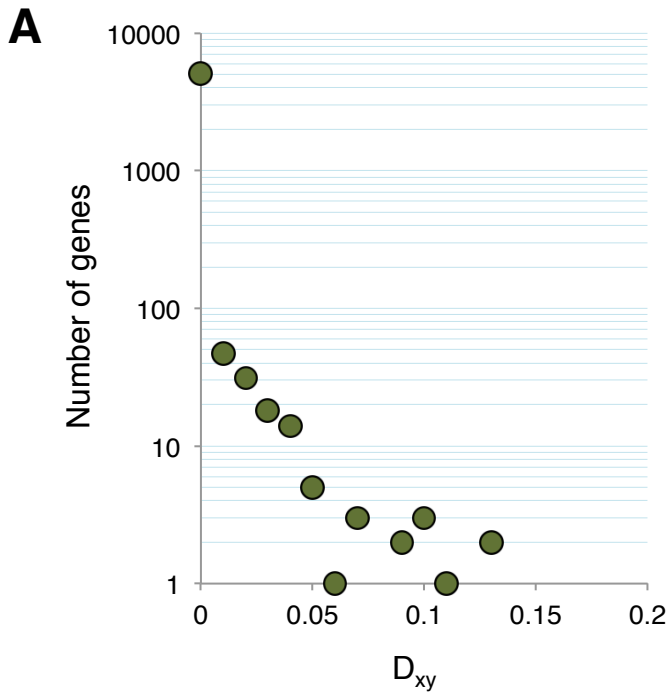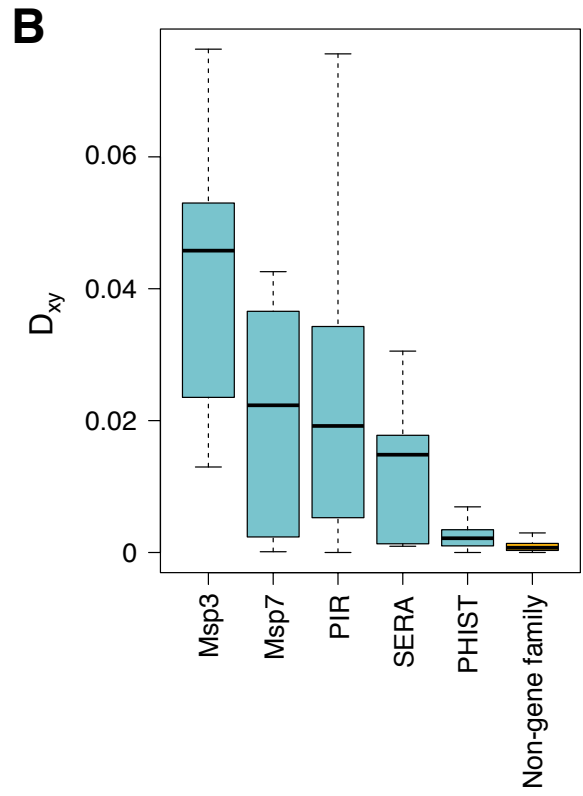

Figure S13

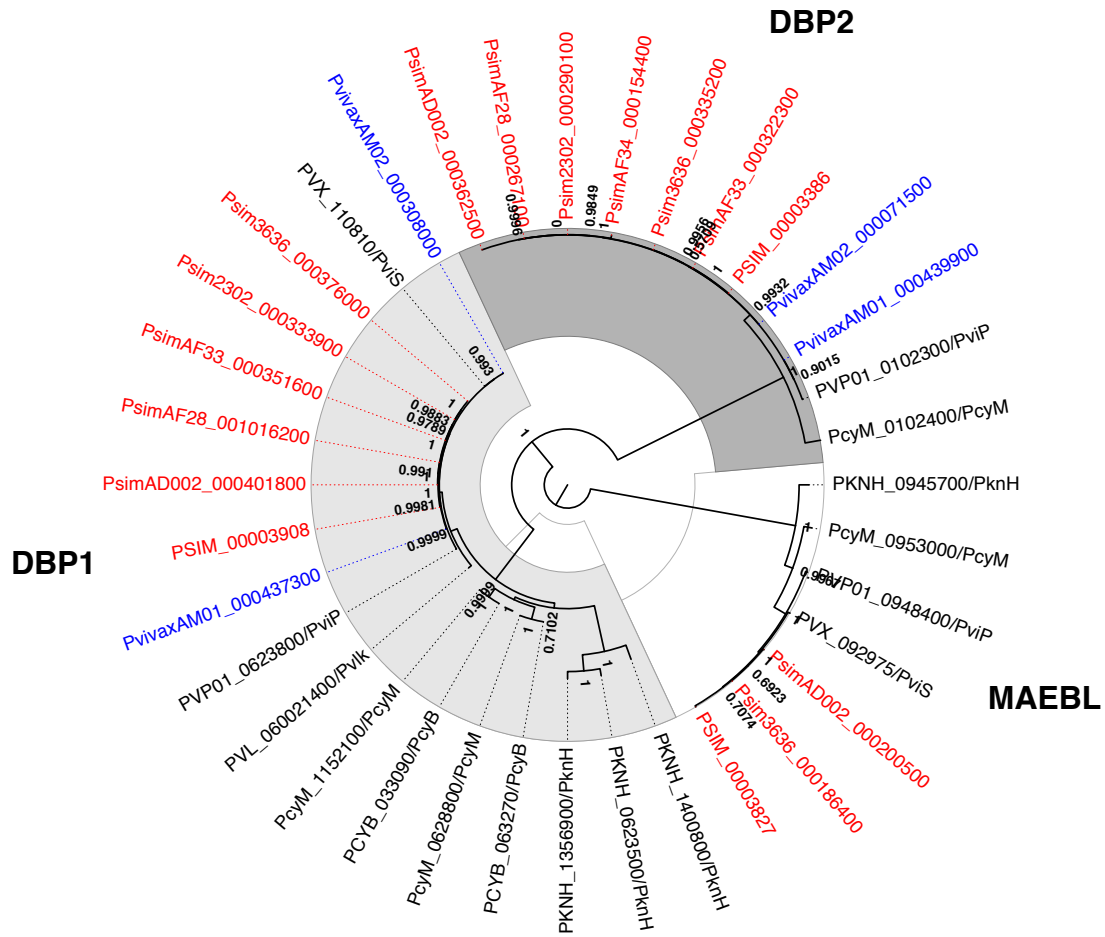



Figure S15

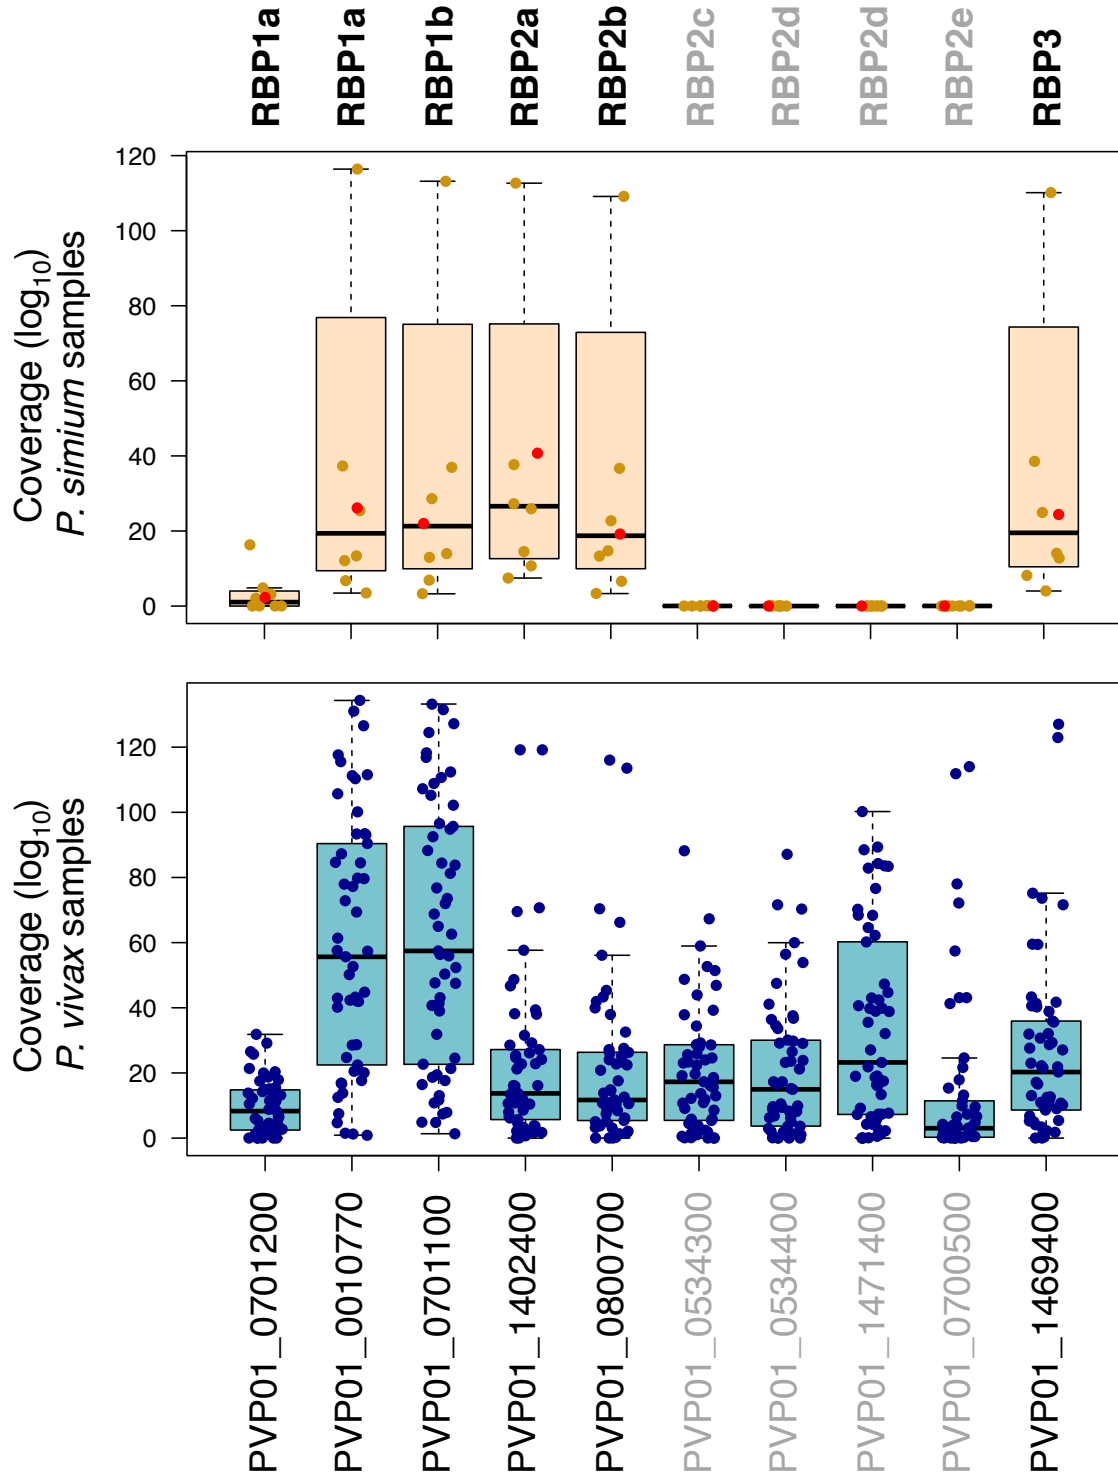

Figure S16

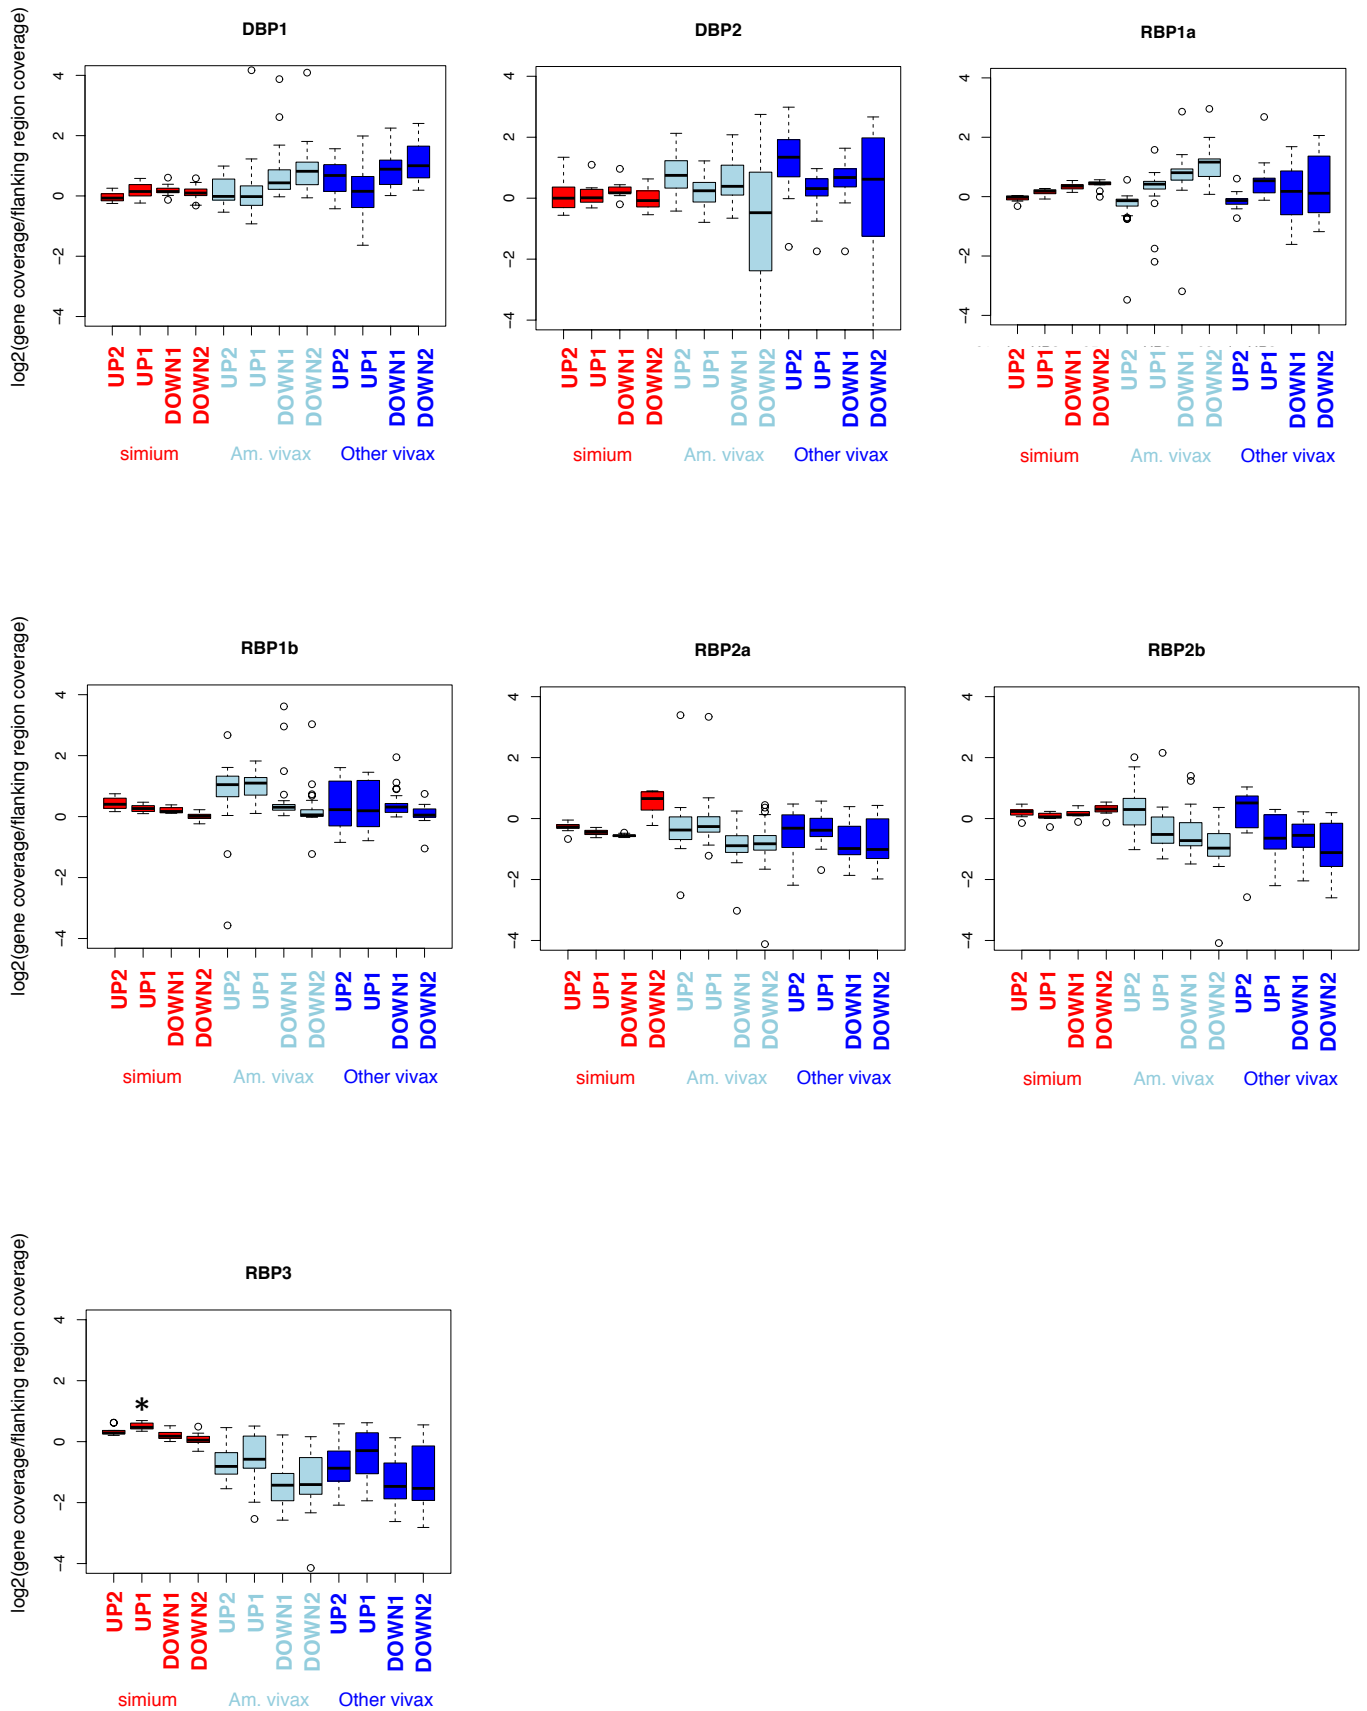



Figure S18

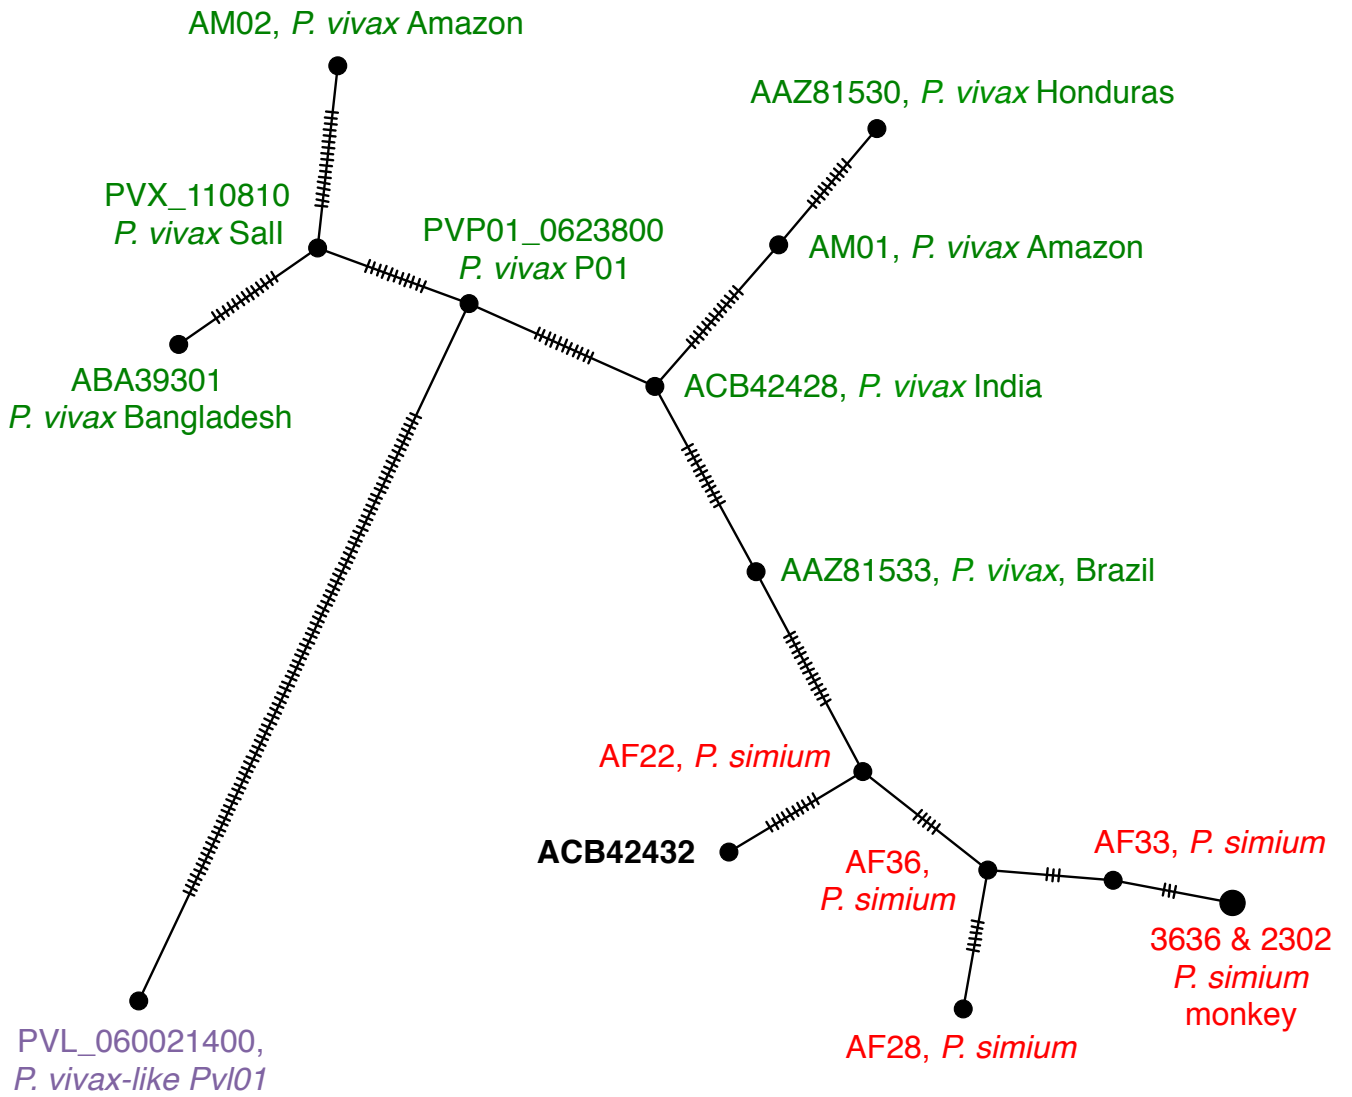

Figure S19

**simium** GGTAACCCCTATAATGGTTT-----GGGGCAAGATAATGAT  
**vivax 1, P01** GGTAACCCCTATAATGGTTTGGGGCATTGAAAGACAATAGTGATAGCGATGGACCTGCGAATTTGCAGAATCTACGAAATCTGCGGAATCAATGGCGAATCCTGATTCAAATAGTAAAGGTGAGACGGGAAAGGGGCAAGATAATGAT  
**vivax 2, SalI** GGTAACCCCTATAATGGTTTGGGGCATTGAAAGACAATAGTGATAGCGATGGAC-----CTCGGAATCAATGGCGAATCCTGATTCAAATAGTAAAGGTGAGACGGGAAAGGGGCAAGATAATGAT  
**vivax 3,** GGTAACCCCTATAATGGTTTGGGGCATTGAAAGACAATAGT-----GATGGACCTGCGAATTTGCAGAATCTACGAAATCTGCGGAATCAATGGCGAATCCTGATTCAAATAGTAAAGGTGAGACGGGAAAGGGGCAAGATAATGAT  
**vivax 4** GGTAACCCCTATAATGGTTTGGGGCATTGAAAGACAATAGT-----GATGGAC-----CTCGGAATCAATGGCGAATCCTGATTCAAATAGTAAAGGTGAGACGGGAAAGGGGCAAGATAATGAT

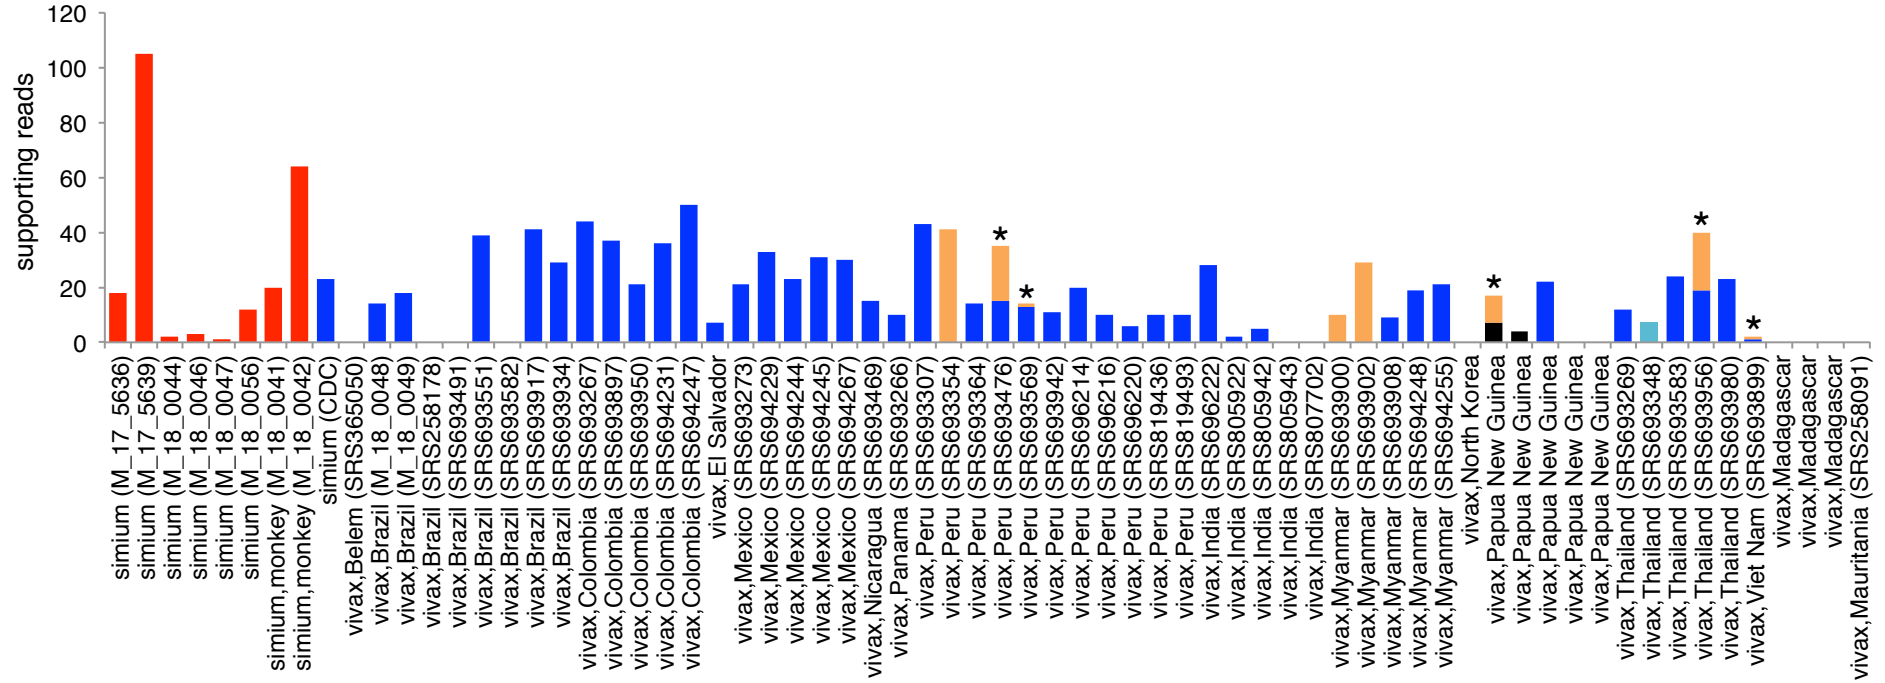

Figure S20

*P. simium* DBP1

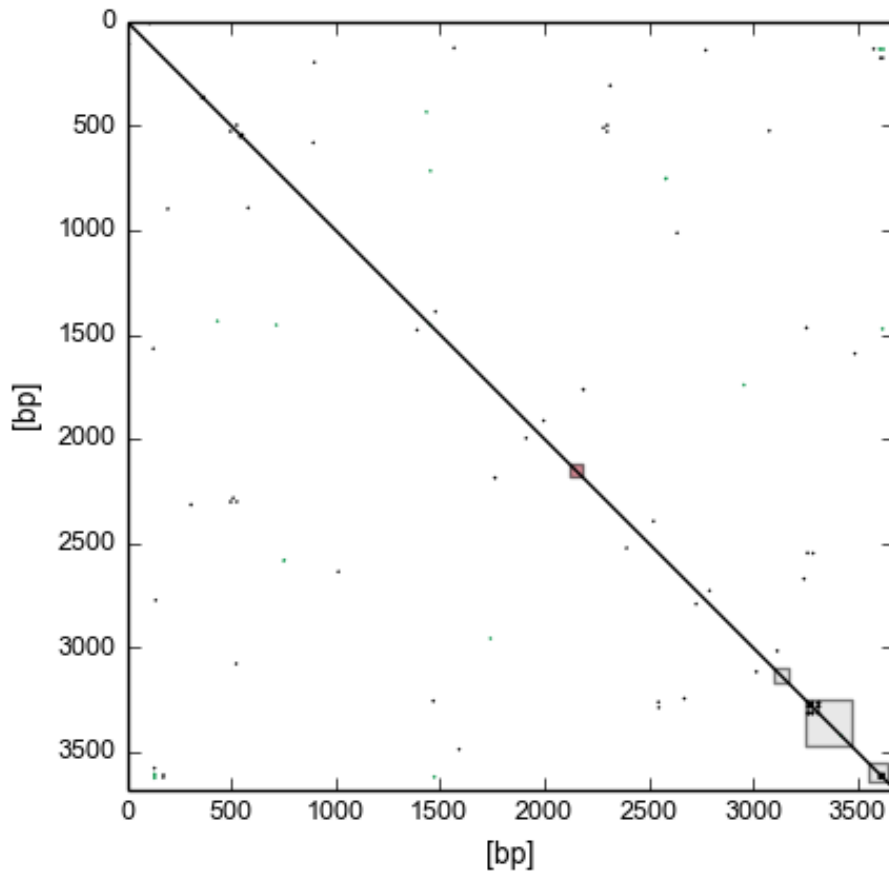

*P. vivax* DBP1

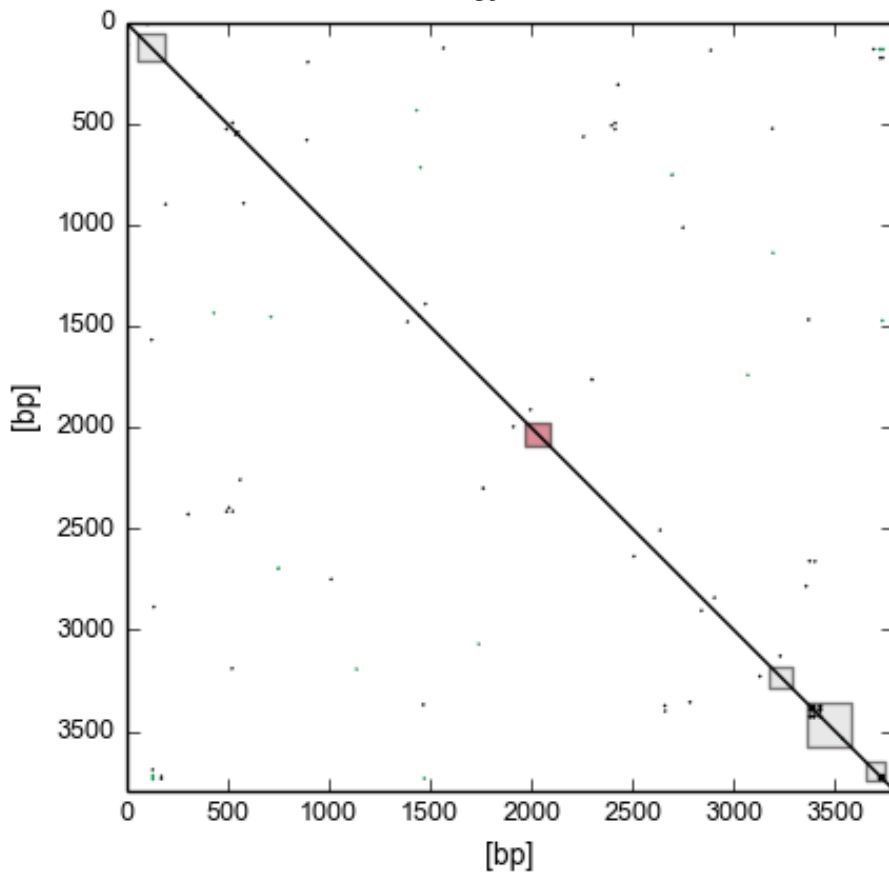

Figure S21

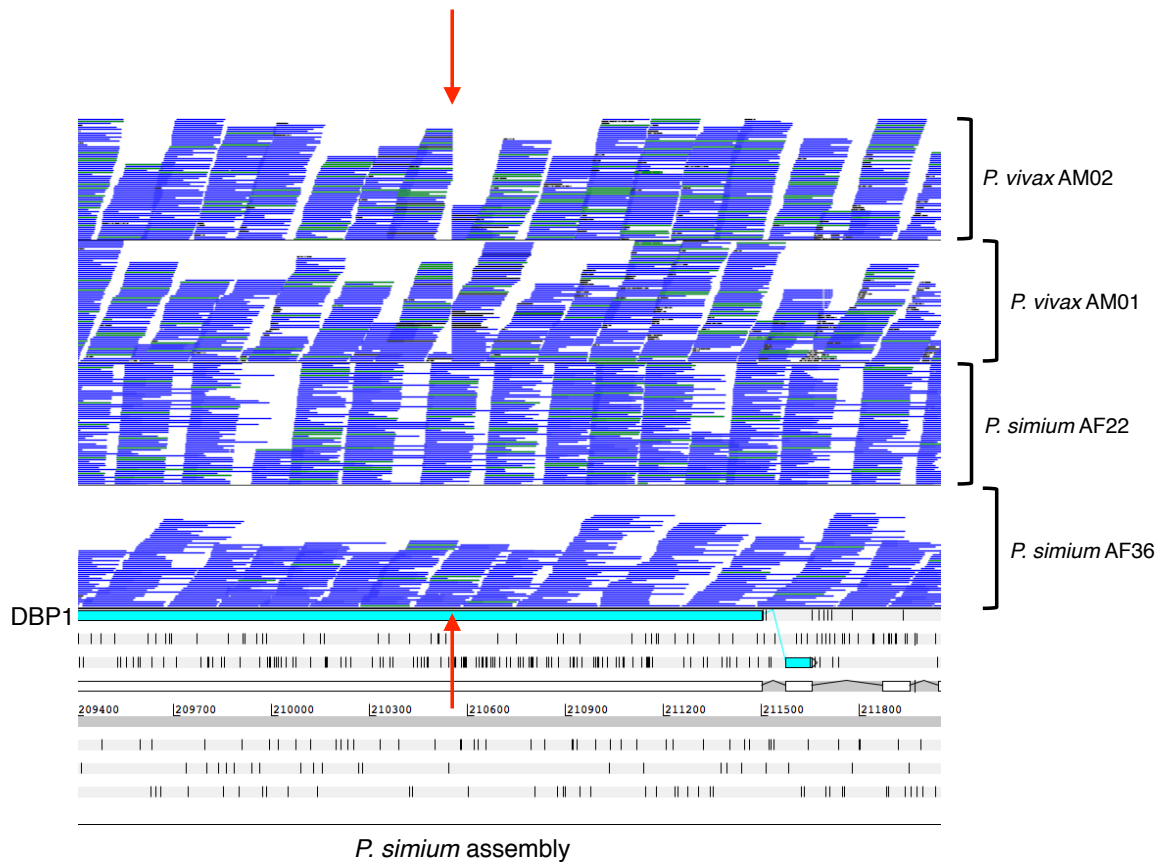

Figure S22

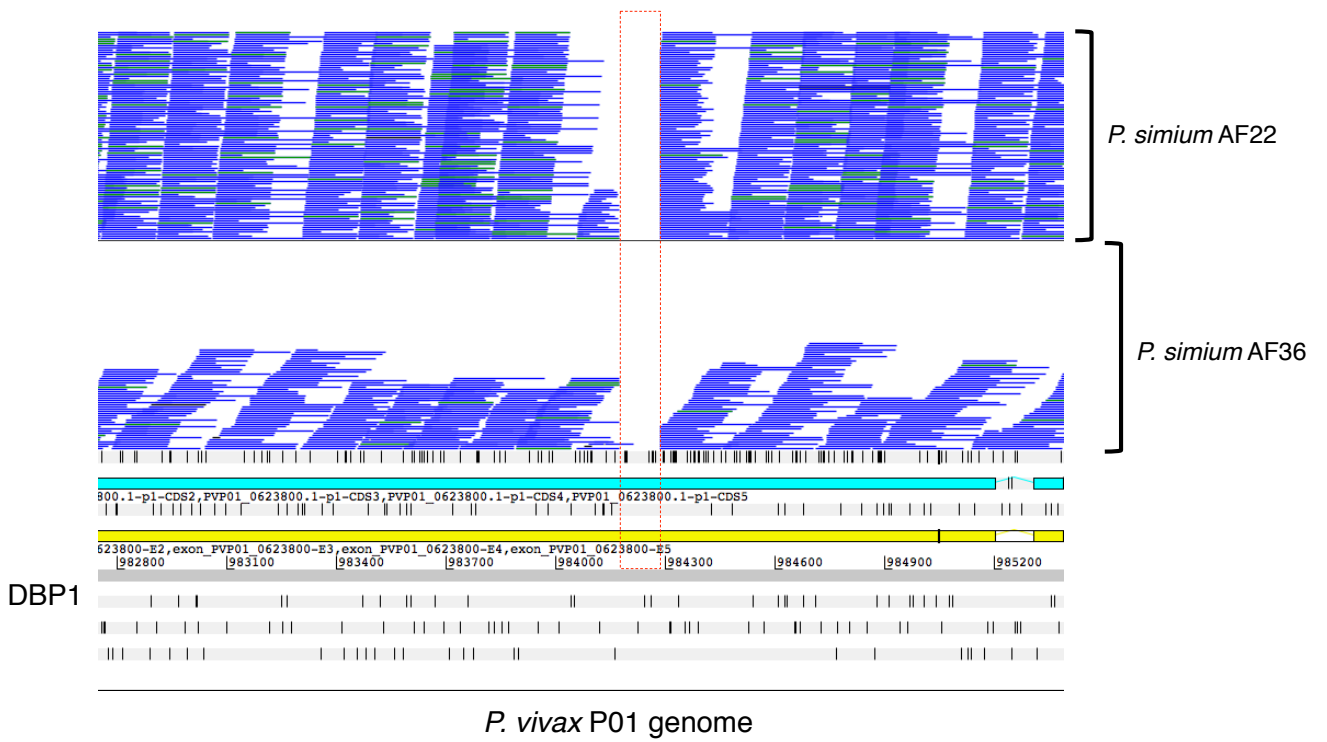

Figure S23

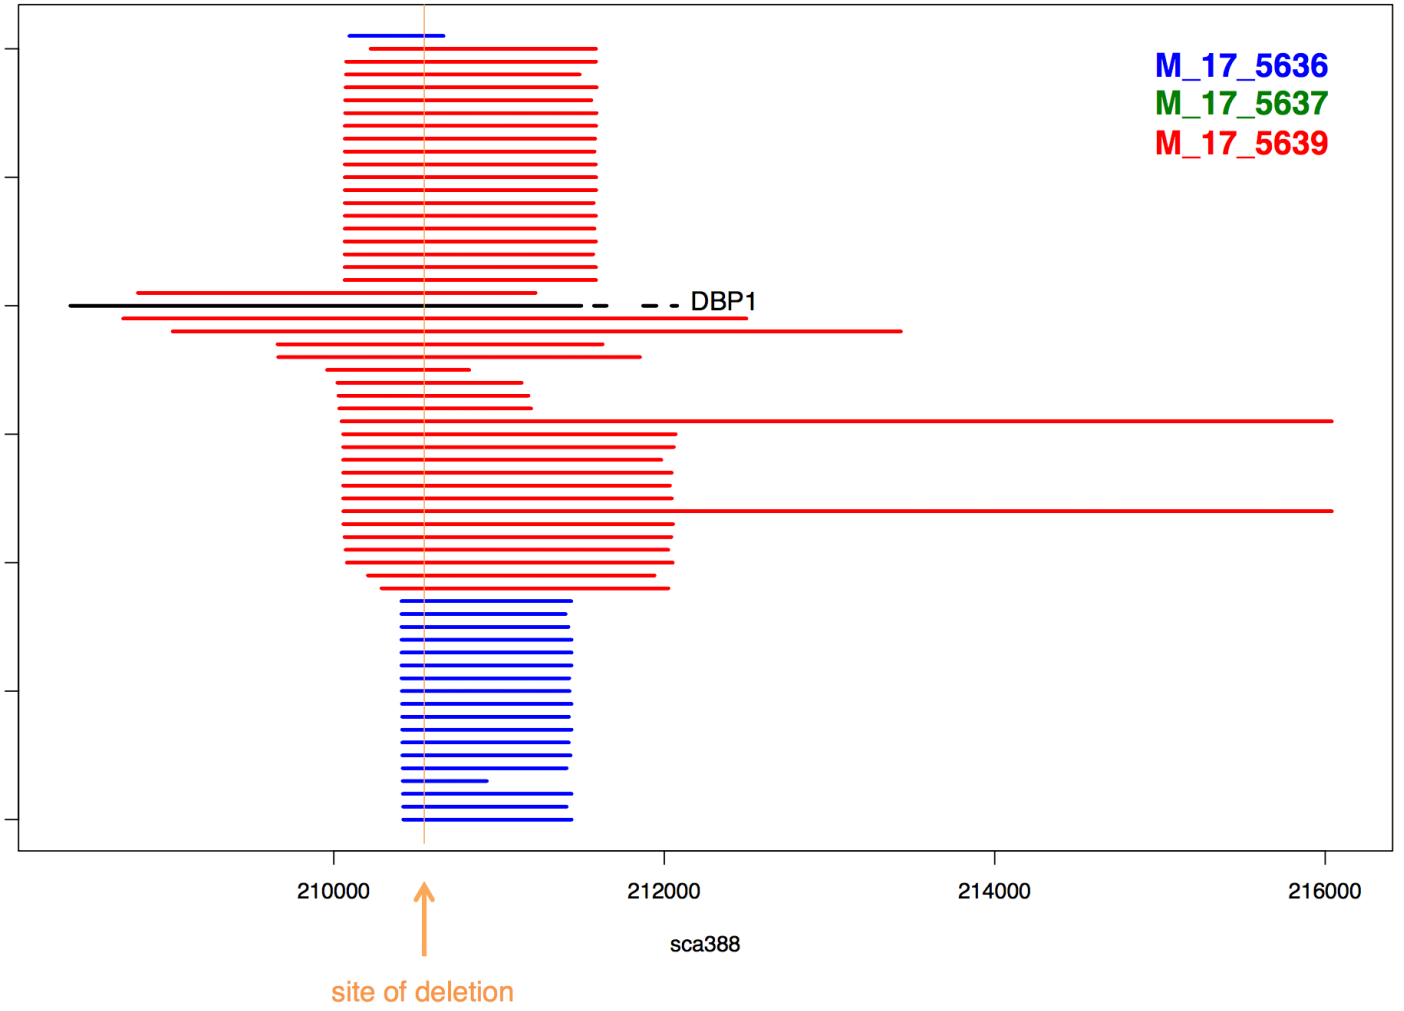

Figure S24

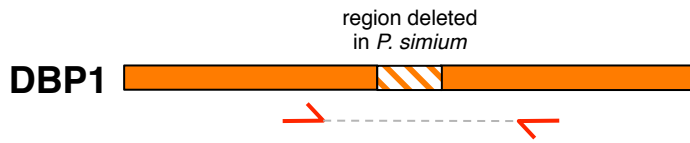

Human cases of *P. vivax*

Expected band sizes:

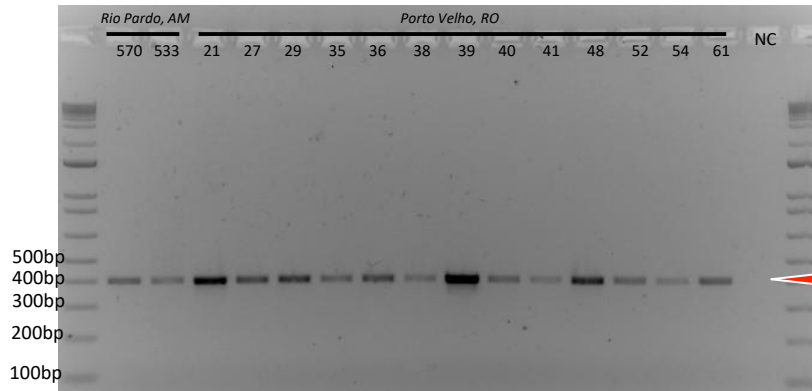

Human cases of *P. simium*

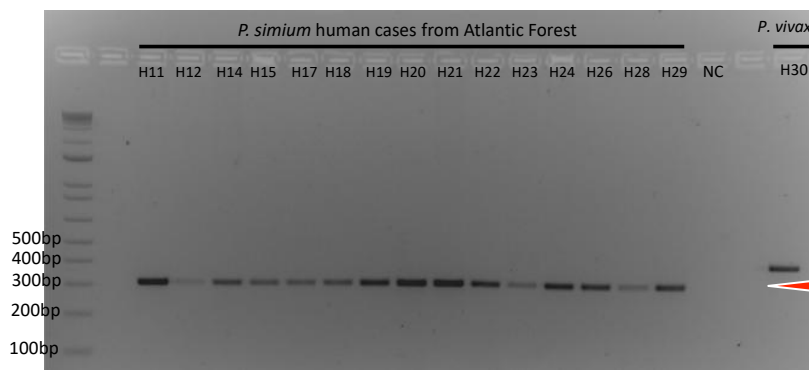

*P. simium* from NHPs

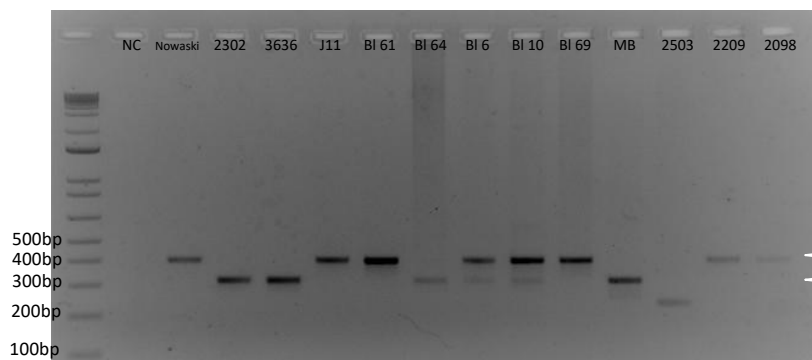

forward primer: ATCGCGACAAAGCTACTGCC  
reverse primer: TCCACAACAATCCCTGCTG

Figure S26

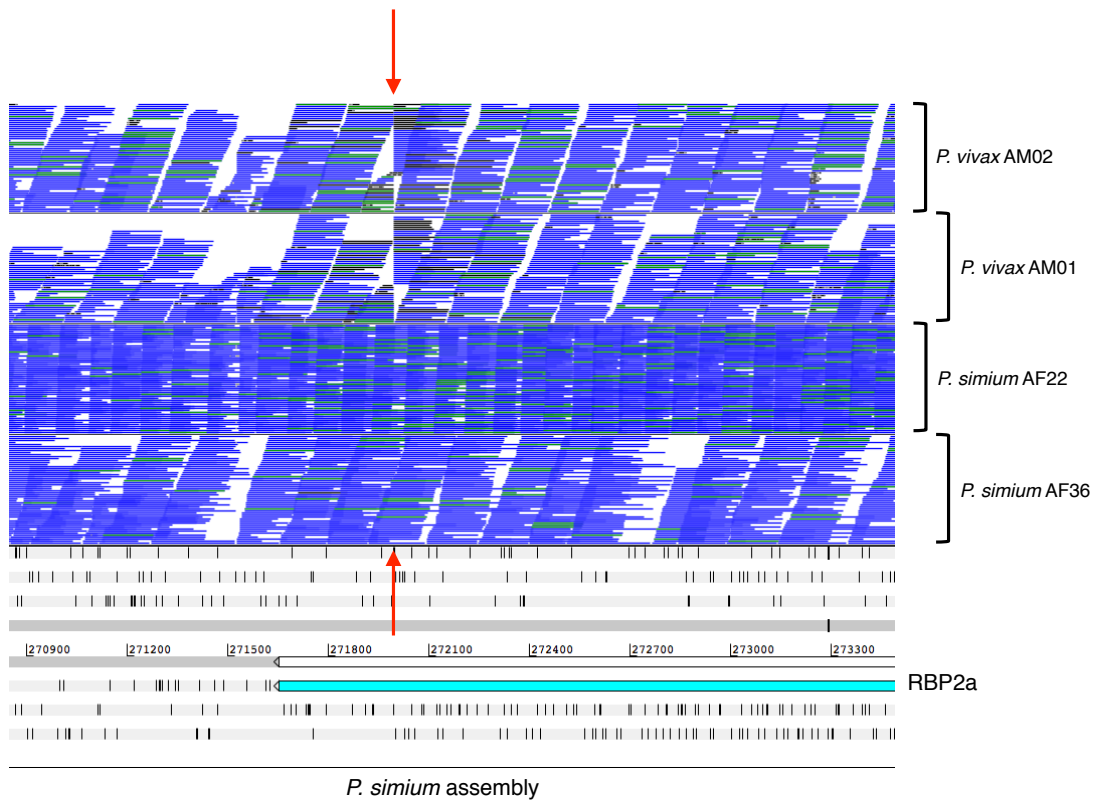





Figure S28

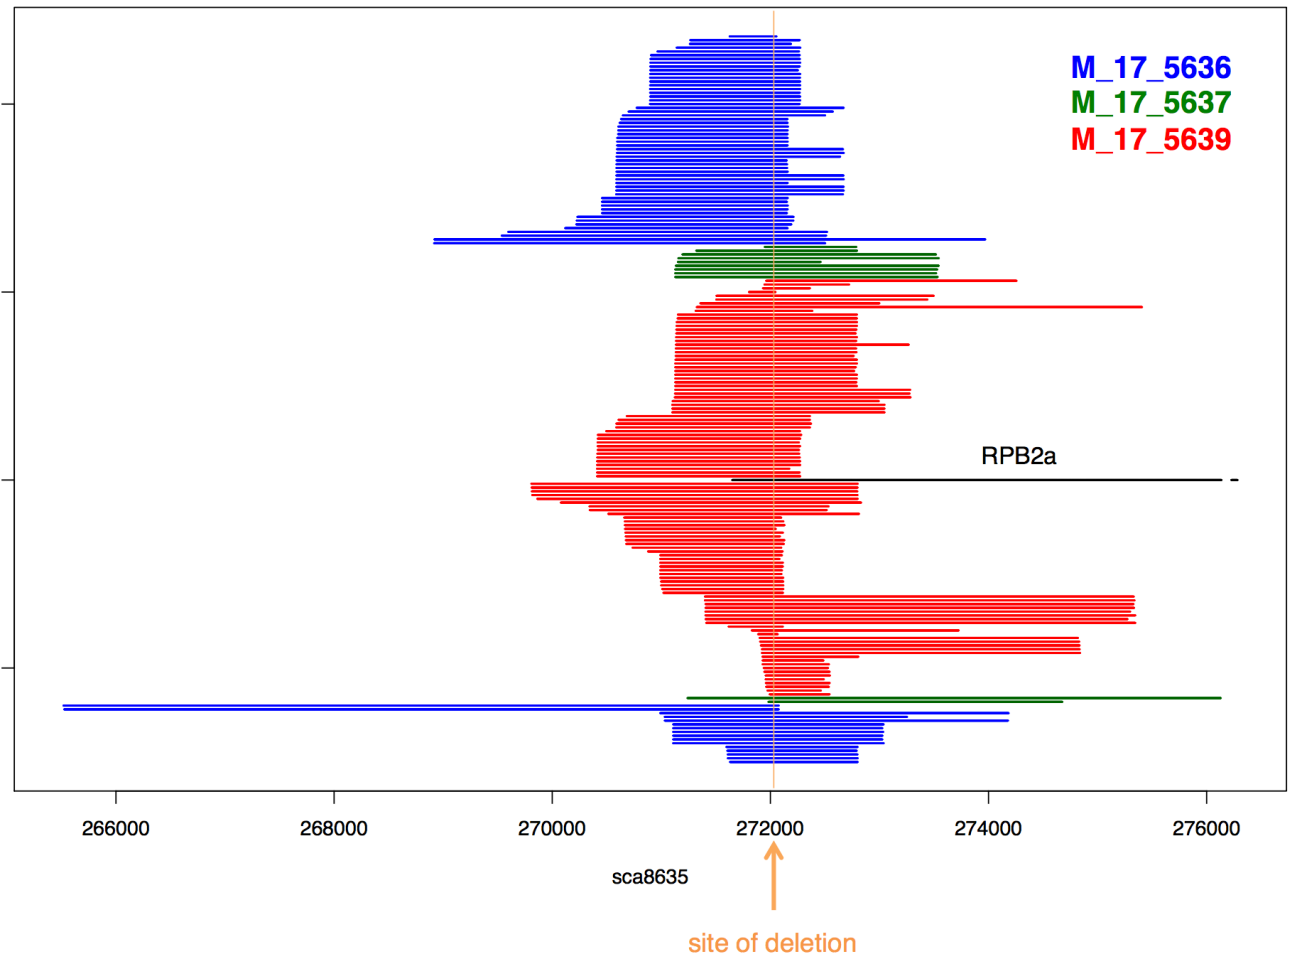

Figure S29

**RBP2a**

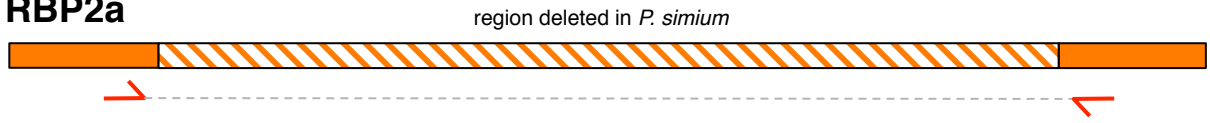

**Human *P. vivax***

Expected band sizes:

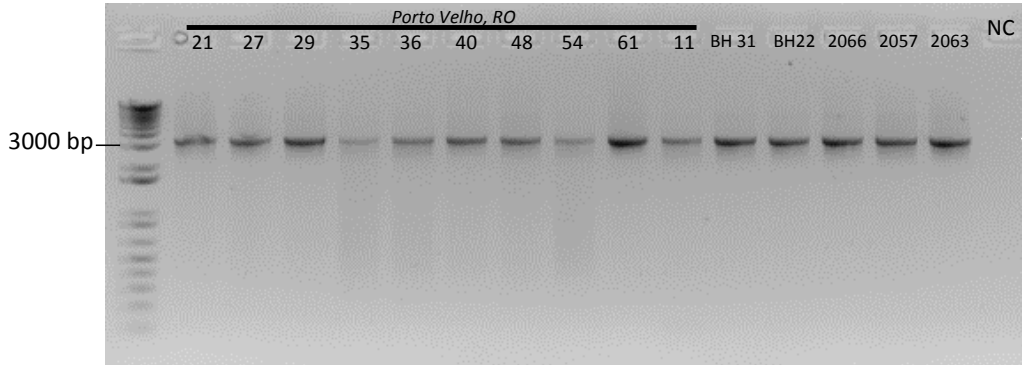

**Human *P. simium***

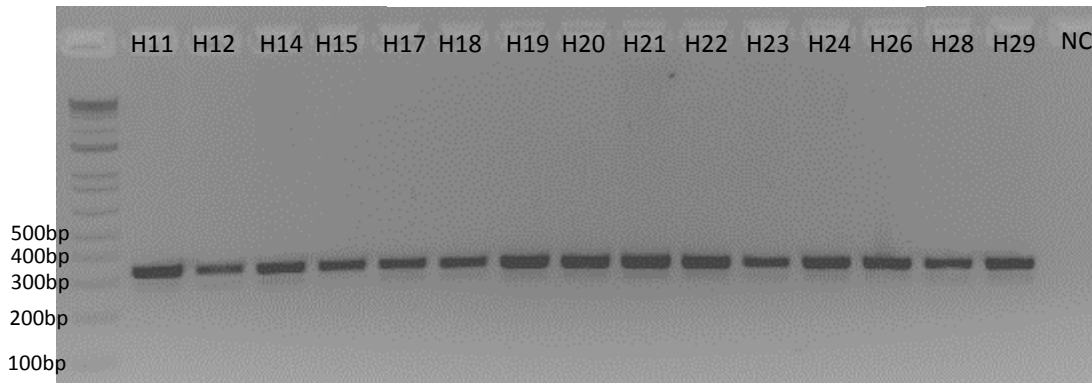

**NHP *P. simium***

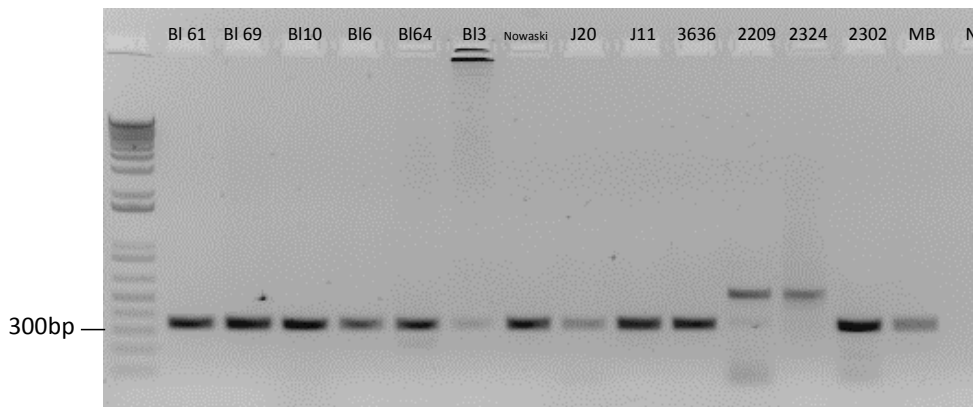

forward primer: AGTGCAAAGCAGAGGAGG  
reverse primer: CCTGCTGCAAACGGACATT

Figure S30

**A**

Percentages of indels in genes with sizes being integers of 1, 2 and 3.

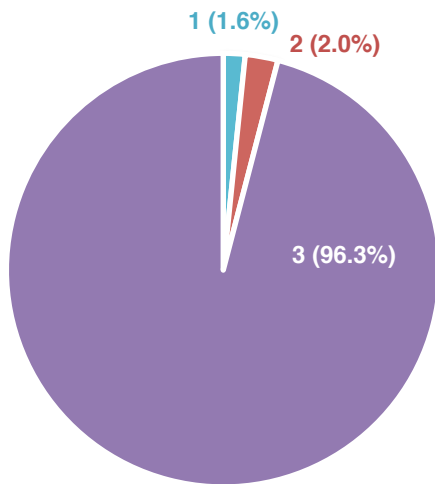

**B**

Percentage of all proteins being low-complexity regions

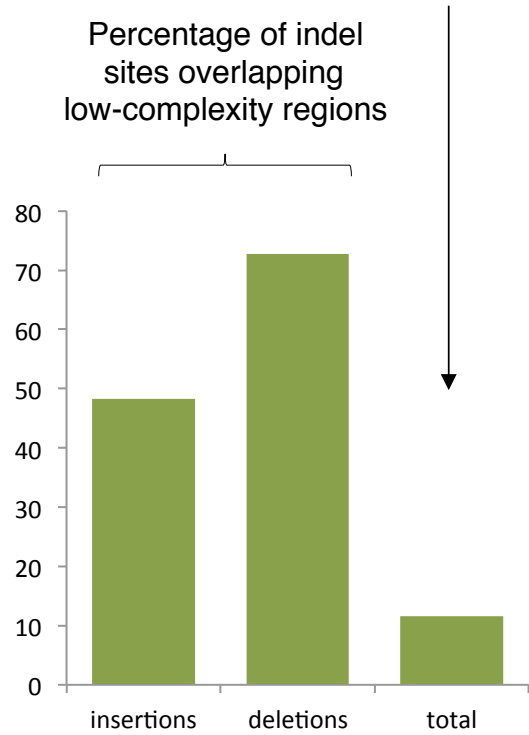

**C**

Protein size distributions for genes with and without indels

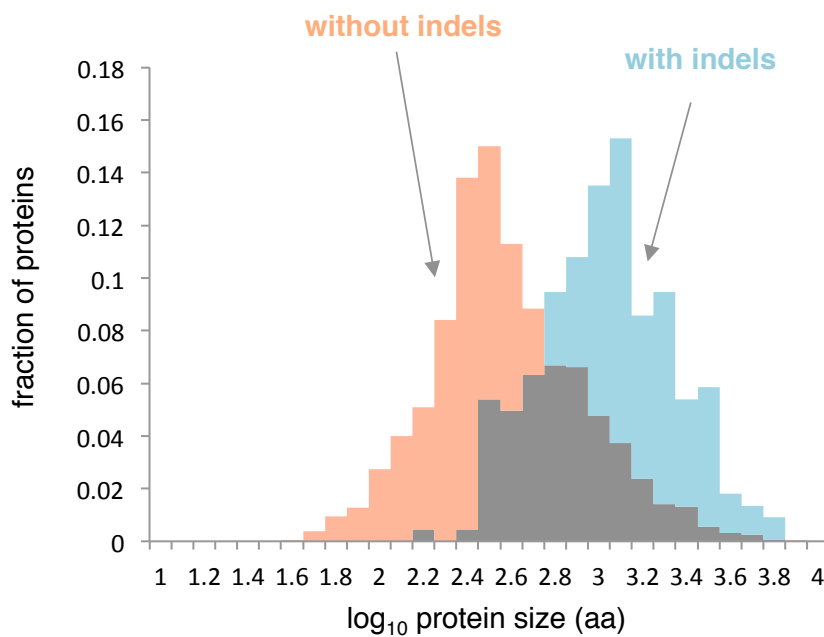

Figure S31

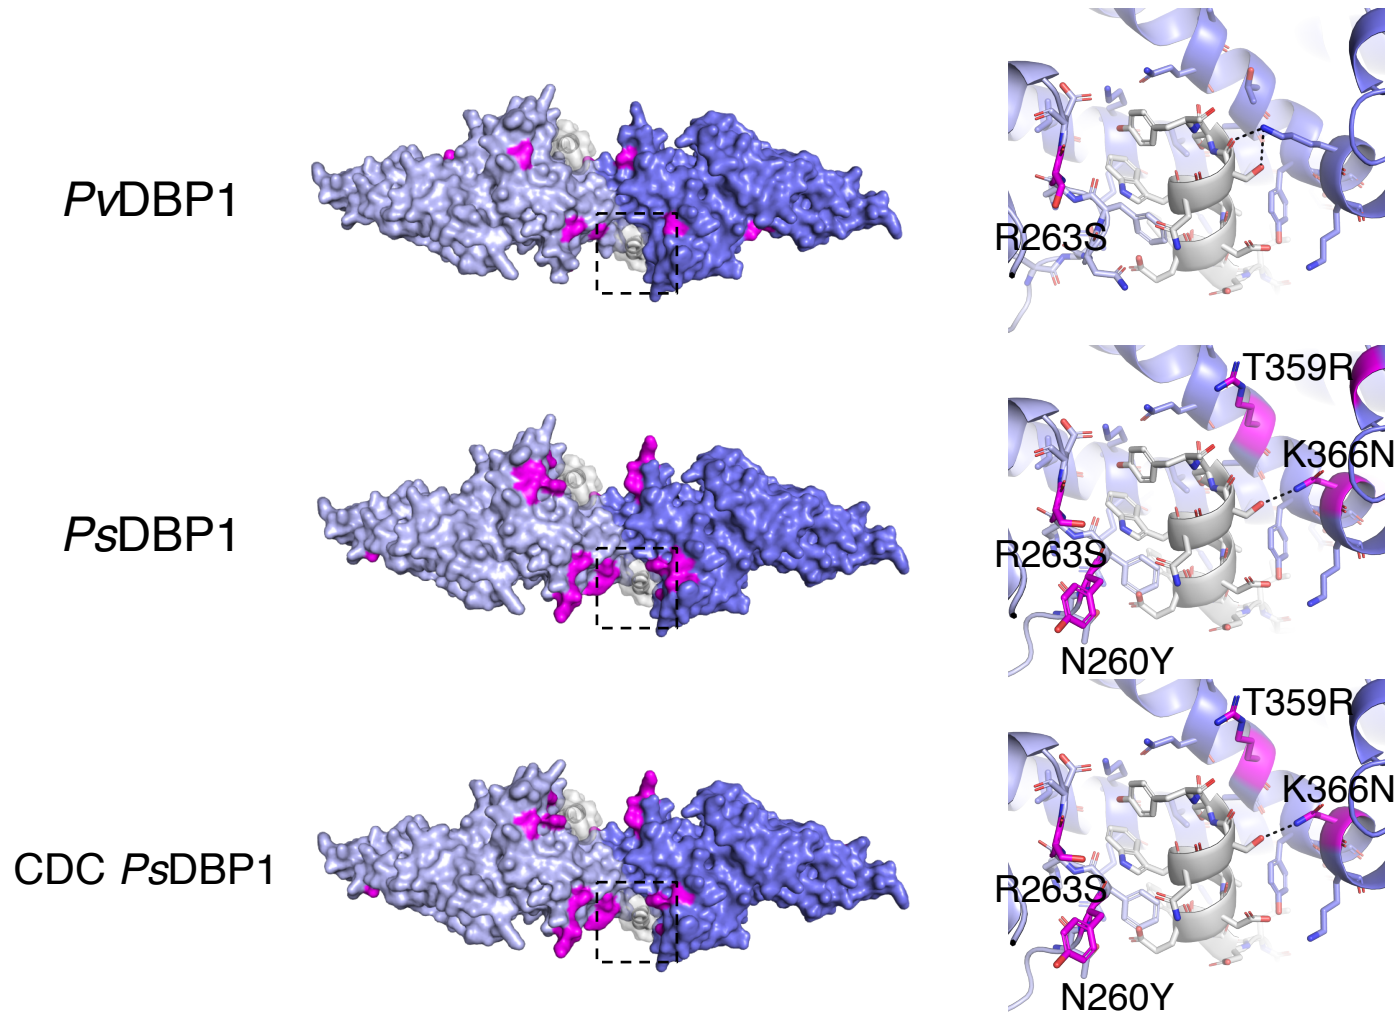

Figure S32

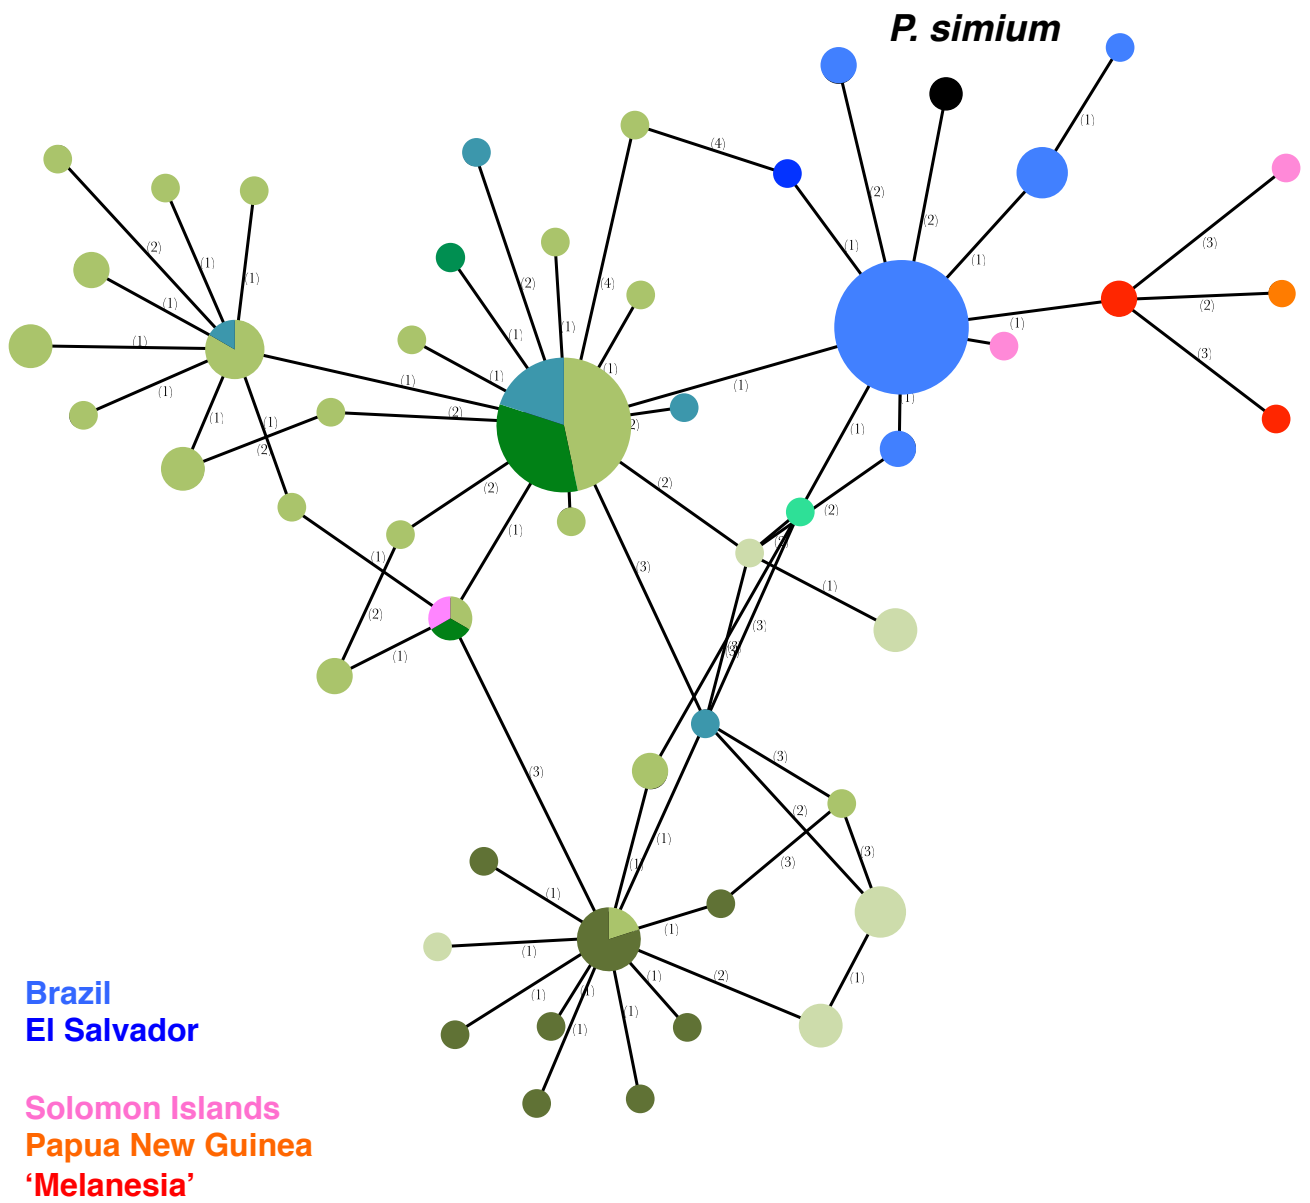

Figure S33

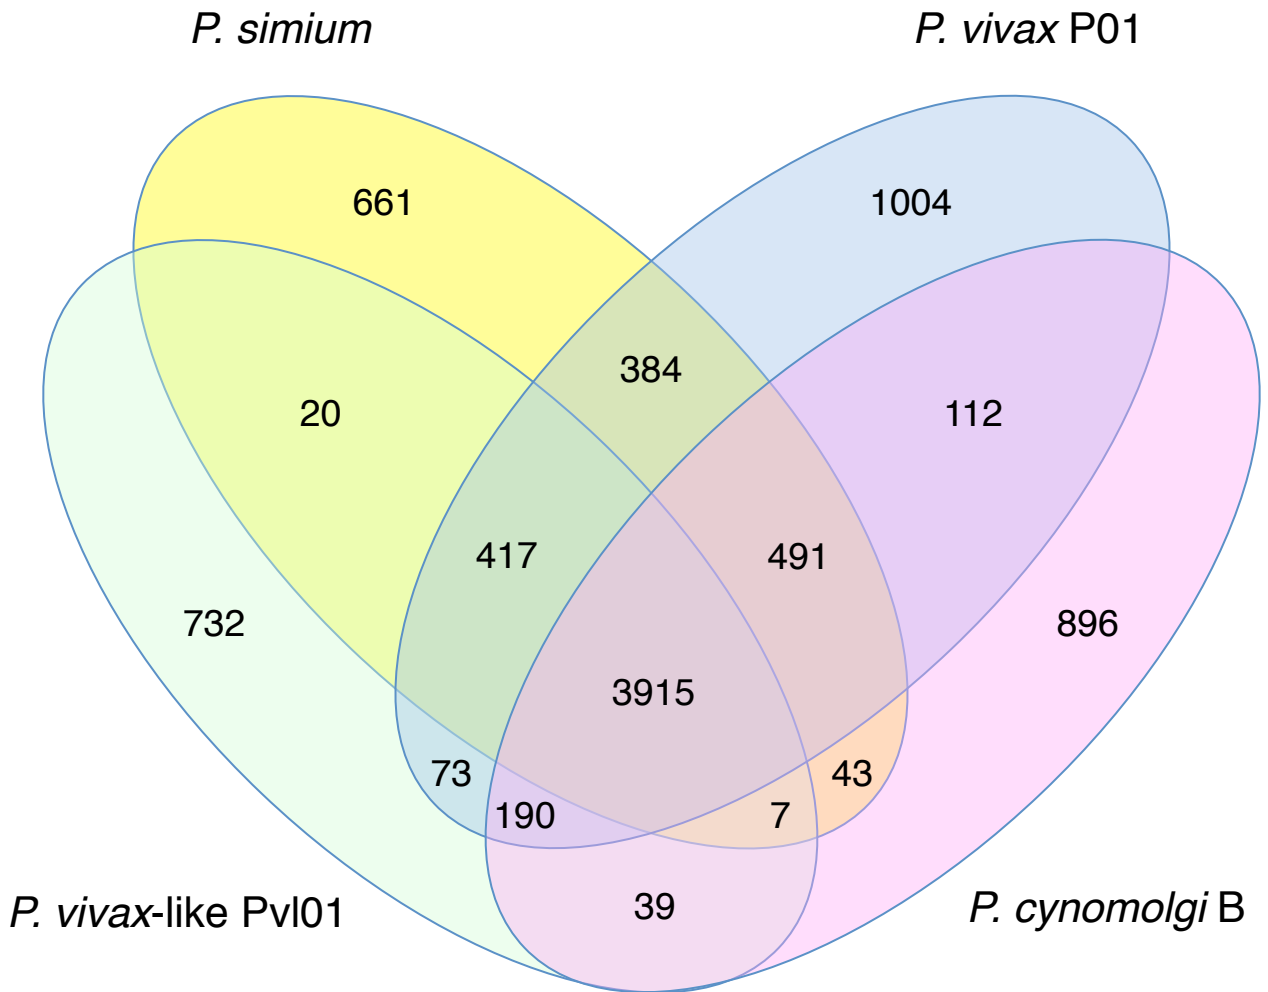

Supplement: 12915_2021_1139_MOESM2_ESM.pdf [file 12915_2021_1139_MOESM2_ESM.pdf]
