# Supplementary material for: The genome of the zoonotic malaria parasite Plasmodium simium reveals adaptations to host switching
Source: PubMed Central journal article supplement (PMC8485552; doi:10.1186/s12915-021-01139-5), 2021-10-01
Supplement: 12915_2021_1139_MOESM3_ESM.pdf [file 12915_2021_1139_MOESM3_ESM.pdf]

Figure S17

Complete alignment of DBP1 protein sequences

PCYB\_063270-t26\_1-p1 MKGKNRPLFVLLVLLSHKVNVLLETTIETLQECKNECVKGENCYKLSKGHHYI EEDNIERWLQGTNERRSEENIKYKY  
PcyM\_0628800-t36\_1-p1 MKGKNRPLFVLLVLLSHKVNVLLETTIETLQECKNECVKGENCYKLSKGHHYI EEDNIERWLQGTNERRSEENIKYKY  
PVP01\_0623800.1-p1 MKGKNRSLFVLLVLLSHKVNVLLETTIETLLECKNEYVKGNGYKLAGHHHCVEEDNLERWLQGTNERRSEENIKYKY  
PVX\_110810.1-p1 MKGKNRSLFVLLVLLSHKVNVLLETTIETLLECKNEYVKGNGYKLAGHHHCVEEDNLERWLQGTNERRSEENIKYKY  
Psim2302\_000333900.1 MKGKNRSLFVLLVLLSHKVNVLLETTIETLLECKNEYVKGNGYKLAGHHHCVEEDNLERWLQGTNERRSEENIKYKY  
Psim3636\_000376000.1 MKGKNRSLFVLLVLLSHKVNVLLETTIETLLECKNEYVKGNGYKLAGHHHCVEEDNLERWLQGTNERRSEENIKYKY  
PsimAD002\_000401800.1 MKGKNRSLFVLLVLLSHKVNVLLETTIETLLECKNEYVKGNGYKLAGHHHCVEEDNLERWLQGTNERRSEENIKYKY  
PsimAD005\_000131600.1 MKGKNRSLFVLLVLLSHKVNVLLETTIETLLECKNEYVKGNGYKLAGHHHCVEEDNLERWLQGTNERRSEENIKYKY  
PsimAF28\_001016200.1 MKGKNRSLFVLLVLLSHKVNVLLETTIETLLECKNEYVKGNGYKLAGHHHCVEEDNLERWLQGTNERRSEENIKYKY  
PsimAF33\_000351600.1 MKGKNRSLFVLLVLLSHKVNVLLETTIETLLECKNEYVKGNGYKLAGHHHCVEEDNLERWLQGTNERRSEENIKYKY  
PvivaxAM01\_000437300.1 MKGKNRSLFVLLVLLSHKVNVLLETTIETLLECKNEYVKGNGYKLAGHHHCVEEDNLERWLQGTNERRSEENIKYKY  
PvivaxAM02\_000308000.1 MKGKNRSLFVLLVLLSHKVNVLLETTIETLLECKNEYVKGNGYKLAGHHHCVEEDNLERWLQGTNERRSEENIKYKY  
AAZ81533.1 MKGKNRSLFVLLVLLSHKVNVLLETTIETLLECKNEYVKGNGYKLAGHHHCVEEDNLERWLQGTNERRSEENIKYKY  
AAZ81530.1 MKGKNRSLFVLLVLLSHKVNVLLETTIETLLECKNEYVKGNGYKLAGHHHCVEEDNLERWLQGTNERRSEENIKYKY  
ABA39301.1 MKGKNRSLFVLLVLLSHKVNVLLETTIETLLECKNEYVKGNGYKLAGHHHCVEEDNLERWLQGTNERRSEENIKYKY  
ACB42428.1 MKGKNRSLFVLLVLLSHKVNVLLETTIETLLECKNEYVKGNGYKLAGHHHCVEEDNLERWLQGTNERRSEENIKYKY  
ACB42432 MKGKNRSLFVLLVLLSHKVNVLLETTIETLLECKNEYVKGNGYKLAGHHHCVEEDNLERWLQGTNERRSEENIKYKY  
PVL\_060021400-t42\_1-p1 MKGKNRSLFVLLVLLSHKVNVLLETTIETLLECKNEYVKGNGYKLAGHHHCVEEDNLERWLQGTNERRSEENIKYKY  
ACB42432.1 MKGKNRSLFVLLVLLSHKVNVLLETTIETLLECKNEYVKGNGYKLAGHHHCVEEDNLERWLQGTNERRSEENIKYKY

PCYB\_063270-t26\_1-p1 GVTELKIKYEQMNGKRTSRILKESIYAQNFDDNYYR-----EEDKGEHKTDSKTDNGRSANNLVMLDYDTSSSG  
PcyM\_0628800-t36\_1-p1 GVTELKIKYEQMNGKRTSRILKESIYAQNFDDNYYR-----EEDKGEHKTDSKTDNGRSANNLVMLDYDTSSSG  
PVP01\_0623800.1-p1 GVTELKIKYEQMNGKRSSRILKESIYGAHNFGGNSYMEGKGGDKTGEEKDGHEHKTDSKTDNGKGANLVMMLDYETSSNG  
PVX\_110810.1-p1 GVTELKIKYEQMNGKRSSRILKESIYGAHNFGGNSYMEGKGGDKTGEEKDGHEHKTDSKTDNGKGANLVMMLDYETSSNG  
Psim2302\_000333900.1 GVTELKIKYEQMNGKRSSRILKESIYGAHNFGGNSYMEGKGGDKTGEEKDGHEHKTDSKTDNGKGANLVMMLDYETSSNG  
Psim3636\_000376000.1 GVTELKIKYEQMNGKRSSRILKESIYGAHNFGGNSYMEGKGGDKTGEEKDGHEHKTDSKTDNGKGANLVMMLDYETSSNG  
PsimAD002\_000401800.1 GVTELKIKYEQMNGKRSSRILKESIYGAHNFGGNSYMEGKGGDKTGEEKDGHEHKTDSKTDNGKGANLVMMLDYETSSNG  
PsimAD005\_000131600.1 GVTELKIKYEQMNGKRSSRILKESIYGAHNFGGNSYMEGKGGDKTGEEKDGHEHKTDSKTDNGKGANLVMMLDYETSSNG  
PsimAF28\_001016200.1 GVTELKIKYEQMNGKRSSRILKESIYGAHNFGGNSYMEGKGGDKTGEEKDGHEHKTDSKTDNGKGANLVMMLDYETSSNG  
PsimAF33\_000351600.1 GVTELKIKYEQMNGKRSSRILKESIYGAHNFGGNSYMEGKGGDKTGEEKDGHEHKTDSKTDNGKGANLVMMLDYETSSNG  
PvivaxAM01\_000437300.1 GVTELKIKYEQMNGKRSSRILKESIYGAHNFGGNSYMEGKGGDKTGEEKDGHEHKTDSKTDNGKGANLVMMLDYETSSNG  
PvivaxAM02\_000308000.1 GVTELKIKYEQMNGKRSSRILKESIYGAHNFGGNSYMEGKGGDKTGEEKDGHEHKTDSKTDNGKGANLVMMLDYETSSNG  
AAZ81533.1 GVTELKIKYEQMNGKRSSRILKESIYGAHNFGGNSYMEGKGGDKTGEEKDGHEHKTDSKTDNGKGANLVMMLDYETSSNG  
AAZ81530.1 GVTELKIKYEQMNGKRSSRILKESIYGAHNFGGNSYMEGKGGDKTGEEKDGHEHKTDSKTDNGKGANLVMMLDYETSSNG  
ABA39301.1 GVTELKIKYEQMNGKRSSRILKESIYGAHNFGGNSYMEGKGGDKTGEEKDGHEHKTDSKTDNGKGANLVMMLDYETSSNG  
ACB42428.1 GVTELKIKYEQMNGKRSSRILKESIYGAHNFGGNSYMEGKGGDKTGEEKDGHEHKTDSKTDNGKGANLVMMLDYETSSNG  
ACB42432 GVTELKIKYEQMNGKRSSRILKESIYGAHNFGGNSYMEGKGGDKTGEEKDGHEHKTDSKTDNGKGANLVMMLDYETSSNG  
PVL\_060021400-t42\_1-p1 DVTELKIKYEQMNGKRSSRILKESIYGAHNFGGNSYMEGKGGDKTGEEKDGHEHKTDSKTDNGKGANLVMMLDYETSSNG  
ACB42432.1 GVTELKIKYEQMNGKRSSRILKESIYGAHNFGGNSYMEGKGGDKTGEEKDGHEHKTDSKTDNGKGANLVMMLDYETSSNG

PCYB\_063270-t26\_1-p1 HPAVTLDNVLEFVTDHGENSLENSNGNLYDIVHKKTMSSGVINHAFLQNSEIVTCNDKRRQRVRDWCSTKQKDVCI  
PcyM\_0628800-t36\_1-p1 HPAVTLDNVLEFVTDHGENSLENSNGNLYDIVHKKTMSSGVINHAFLQNSEIVTCNDKRRQRVRDWCSTKQKDVCI  
PVP01\_0623800.1-p1 QPAGTLDNVLEFVTGHEGNSRKNSSNGNPNYIDHKKTISSAIINHAFLQNTVMKNCNYKRRRERDWCNTKQKDVCI  
PVX\_110810.1-p1 QPAGTLDNVLEFVTGHEGNSRKNSSNGNPNYIDHKKTISSAIINHAFLQNTVMKNCNYKRRRERDWCNTKQKDVCI  
Psim2302\_000333900.1 QPAGTLDNVLEFVTGHEGNSRKNSSNGNPNYIDHKKTISSAIINHAFLQNTVMKNCNYKRRRERDWCNTKQKDVCI  
Psim3636\_000376000.1 QPAGTLDNVLEFVTGHEGNSRKNSSNGNPNYIDHKKTISSAIINHAFLQNTVMKNCNYKRRRERDWCNTKQKDVCI  
PsimAD002\_000401800.1 QPAGTLDNVLEFVTGHEGNSRKNSSNGNPNYIDHKKTISSAIINHAFLQNTVMKNCNYKRRRERDWCNTKQKDVCI  
PsimAD005\_000131600.1 QPAGTLDNVLEFVTGHEGNSRKNSSNGNPNYIDHKKTISSAIINHAFLQNTVMKNCNYKRRRERDWCNTKQKDVCI  
PsimAF28\_001016200.1 QPAGTLDNVLEFVTGHEGNSRKNSSNGNPNYIDHKKTISSAIINHAFLQNTVMKNCNYKRRRERDWCNTKQKDVCI  
PsimAF33\_000351600.1 QPAGTLDNVLEFVTGHEGNSRKNSSNGNPNYIDHKKTISSAIINHAFLQNTVMKNCNYKRRRERDWCNTKQKDVCI  
PvivaxAM01\_000437300.1 QPAGTLDNVLEFVTGHEGNSRKNSSNGNPNYIDHKKTISSAIINHAFLQNTVMKNCNYKRRRERDWCNTKQKDVCI  
PvivaxAM02\_000308000.1 EPAGTLDNVLEFVTGHEGNSRKNSSNGNPNYIDHKKTISSAIINHAFLQNTVMKNCNYKRRRERDWCNTKQKDVCI  
AAZ81533.1 QPAGTLDNVLEFVTGHEGNSRKNSSNGNPNYIDHKKTISSAIINHAFLQNTVMKNCNYKRRRERDWCNTKQKDVCI  
AAZ81530.1 QPAGTLDNVLEFVTGHEGNSRKNSSNGNPNYIDHKKTISSAIINHAFLQNTVMKNCNYKRRRERDWCNTKQKDVCI  
ABA39301.1 QPAGTLDNVLEFVTGHEGNSRKNSSNGNPNYIDHKKTISSAIINHAFLQNTVMKNCNYKRRRERDWCNTKQKDVCI  
ACB42428.1 QPAGTLDNVLEFVTGHEGNSRKNSSNGNPNYIDHKKTISSAIINHAFLQNTVMKNCNYKRRRERDWCNTKQKDVCI  
ACB42432 QPAGTLDNVLEFVTGHEGNSRKNSSNGNPNYIDHKKTISSAIINHAFLQNTVMKNCNYKRRRERDWCNTKQKDVCI  
PVL\_060021400-t42\_1-p1 QPTGTLDNVLEFVTGHEGNSRKNSSNGNPNYIDHKKTISSAIINHAFLQNSVMKNCNDRKRRERDWCNTKQKDVCI  
ACB42432.1 QPAGTLDNVLEFVTGHEGNSRKNSSNGNPNYIDHKKTISSAIINHAFLQNTVMKNCNDRKRRERDWCNTKQKDVCI







Figure S17 (cont.)

|                        |                                                                                 |
|------------------------|---------------------------------------------------------------------------------|
| PCYB_063270-t26_1-p1   | MSSNTCSREKSKNLCCSISDYCLNYFEVYTNEYHNCMKKEFEDPSYKCFKGGFTDKAYFAAGGALLILLLLITSRHMII |
| PcyM_0628800-t36_1-p1  | MSSNTCSREKSKNLCCSISDYCLNYFEVYTNEYHNCMKKEFEDPSYKCFKGGFTDKAYFAAGGALLILLLLITSRHMII |
| PVP01_0623800.1-p1     | ISSNTCSREKSKNLCCSISDFCLNYFDVYSYEHSCMKKEFEDPSYKCFKGGFKDKTYFAAAGALLILLLLIASRKMII  |
| PVX_110810.1-p1        | ISSNTCSREKSKNLCCSISDFCLNYFDVYSYEYLSCKMKEFEDPSYKCFKGGFKDKTYFAAAGALLILLLLIASRKMII |
| Psim2302_000333900.1   | ISSNTCSREKSKNLCCSISDFCLNYFDVHSYEYLSCKMKEFEDPSYKCFKGGFKDKTYFAAAGALLILLLLIASRKMII |
| Psim3636_000376000.1   | ISSNTCSREKSKNLCCSISDFCLNYFDVHSYEYLSCKMKEFEDPSYKCFKGGFKDKTYFAAAGALLILLLLIASRKMII |
| PsimAD002_000401800.1  | ISSNTCSREKSKNLCCSISDFCLNYFDVHSYEYLSCKMKEFEDPSYKCFKGGFKDKTYFAAAGALLILLLLIASRKMII |
| PsimAD005_000131600.1  | ISSNTCSREKSKNLCCSISDFCLNYFDVHSYEYLSCKMKEFEDPSYKCFKGGFKDKTYFAAAGALLILLLLIASRKMII |
| PsimAF28_001016200.1   | ISSNTCSREKSKNLCCSISDFCLNYFDVHSYEYLSCKMKEFEDPSYKCFKGGFKDKTYFAAAGALLILLLLIASRKMII |
| PsimAF33_000351600.1   | ISSNTCSREKSKNLCCSISDFCLNYFDVHSYEYLSCKMKEFEDPSYKCFKGGFKDKTYFAAAGALLILLLLIASRKMII |
| PvivaxAM01_000437300.1 | ISSNTCSREKSKNLCCSISDFCLNYFDVNSYEHSCMKKEFEDPSYKCFKGGFKDKTYFAAAGALLILLLLIASRKMII  |
| PvivaxAM02_000308000.1 | ISSNTCSREKSKNLCCSISDFCLNYFDVYSYEYLSCKMKEFEDPSYKCFKGGFKDKTYFAAAGALLILLLLIASRKMII |
| AAZ81533.1             | ISSNTCSREKSKNLCCSISDFCLNYFDVYSYEYLSCKMKEFEDPSYKCFKGGFKDKTYFAAAGALLILLLLIASRKMII |
| AAZ81530.1             | ISSNTCSREKSKNLCCSISDFCLNYFDVNSYEHSCMKKEFEDPSYKCFKGGFKDKTYFAAAGALLILLLLIASRKMII  |
| ABA39301.1             | ISSNTCSREKSKNLCCSISDFCLNYFDVYSYEYLSCKMKEFEDPSYKCFKGGFKDKTYFAAAGALLILLLLIASRKMII |
| ACB42428.1             | ISSNTCSREKSKNLCCSISDFCLNYFDVNSYEHSCVKKEFEDPSYKCFKGGFKDKTYFAAAGALLILLLLIASRKMII  |
| ACB42432               | ISSNTCSREKSKNLCCSISDFCLNYFDVHSYEYLSCKMKEFEDPSYKCFKGGFKDKTYFAAAGALLILLLLIASRKMII |
| PVL_060021400-t42_1-p1 | ISSNTCSREKSKNLCCSISDFCLNYFDVYSFEYHNCMKKEFEDPSYKCFKGGFTDNTYFAAAGALLILLLLIASRKMII |
| ACB42432.1             | ISSNTCSREKSKNLCCSISDFCLNYFDVHSYEYLSCKMKEFEDPSYKCFKGGFKDKTYFAAAGALLILLLLIASRKMII |
| Trans-membrane domain  | <----->                                                                         |
| PCYB_063270-t26_1-p1   | NDSEEATFNEFEEHCDNIQRIPLMPNIEHMQLTPLDYS                                          |
| PcyM_0628800-t36_1-p1  | NDSEEATFNEFEEHCDNIQRIPLMPNIEHMQLTPLDYS                                          |
| PVP01_0623800.1-p1     | NDSEEATFNEFEEYCDNIHRIPLMPNIEHMQPSTPLDYS                                         |
| PVX_110810.1-p1        | NDSEEATFNEFEEYCDNIHRIPLMPNIEHMQPSTPLDYS                                         |
| Psim2302_000333900.1   | NDSEEATFNEFEEYCDNIHRIPLMPNIEHMQPSTPLDYS                                         |
| Psim3636_000376000.1   | NDSEEATFNEFEEYCDNIHRIPLMPNIEHMQPSTPLDYS                                         |
| PsimAD002_000401800.1  | NDSEEATFNEFEEYCDNIHRIPLMPNIEHMQPSTPLDYS                                         |
| PsimAD005_000131600.1  | NDSEEATFNEFEEYCDNIHRIPLMPNIEHMQPSTPLDYS                                         |
| PsimAF28_001016200.1   | NDSEEATFNEFEEYCDNIHRIPLMPNIEHMQPSTPLDYS                                         |
| PsimAF33_000351600.1   | NDSEEATFNEFEEYCDNIHRIPLMPNIEHMQPSTPLDYS                                         |
| PvivaxAM01_000437300.1 | NDSEEATFNEFEEYCDNIHRIPLMPNIEHMQPSTPLDYS                                         |
| PvivaxAM02_000308000.1 | NDSEEATFNEFEEYCDNIHRIPLMPNIEHMQPSTPLDYS                                         |
| AAZ81533.1             | NDSEEATFNEFEEYCDNIHRIPLM-----                                                   |
| AAZ81530.1             | NDSEEATFNEFEEYCDNIHRIPLM-----                                                   |
| ABA39301.1             | NDSEEATFNAFEEYCDNIHRIPLM-----                                                   |
| ACB42428.1             | NDSEEATFKEFEEYCDNIHRIPLMPNIEHMQPSTPLDYS                                         |
| ACB42432               | NDSEEATFNEFEEYCDNIHRIPLMPNIEHMQPSTPLDYS                                         |
| PVL_060021400-t42_1-p1 | NDSEEATFNEFEEYCDNIHRIPLMPNIEHMQPSTPLDYS                                         |
| ACB42432.1             | NDSEEATFNEFEEYCDNIHRIPLMPNIEHMQPSTPLDYS                                         |
