# Supplementary material for: The genome of the zoonotic malaria parasite Plasmodium simium reveals adaptations to host switching
Source: PubMed Central journal article supplement (PMC8485552; doi:10.1186/s12915-021-01139-5), 2021-10-01
Supplement: 12915_2021_1139_MOESM4_ESM.pdf [file 12915_2021_1139_MOESM4_ESM.pdf]

Figure S25

Complete alignment of RBP2a protein sequences

PVX\_121920.1-p1 MENKVLWAVFYNLVFLFLLASSKESNRKAYKYLKKEPKLWPLQDSLNESDKFEYTTGGKENPPNFFSSNVKAHNKKEGKKY  
PVP01\_1402400.1-p1 MENKVLWAVFYNLVFLFLLASSKESNRKAYKYLKKEPKLWPLQDSLNESDKFEYTTGGKENPPNFFSSNVKAHNKKEGKKY  
Psm12302\_000007000.1 MENKVLWAVFYNLVFLFLLASSKESNRKAYKYLKKEPKLWPLQDSLNESDKFEYTTGGKENPPNFFSSNVKAHNKKEGKKY  
Psm13636\_000006300.1 MENKVLWAVFYNLVFLFLLASSKESNRKAYKYLKKEPKLWPLQDSLNESDKFEYTTGGKENPPNFFSSNVKAHNKKEGKKY  
PsmAD002\_000007200.1 MENKVLWAVFYNLVFLFLLASSKESNRKAYKYLKKEPKLWPLQDSLNESDKFEYTTGGKENPPNFFSSNVKAHNKKEGKKY  
PsmAD005\_000448800.1 MENKVLWAVFYNLVFLFLLASSKESNRKAYKYLKKEPKLWPLQDSLNESDKFEYTTGGKENPPNFFSSNVKAHNKKEGKKY  
PsmAF28\_000006200.1 MENKVLWAVFYNLVFLFLLASSKESNRKAYKYLKKEPKLWPLQDSLNESDKFEYTTGGKENPPNFFSSNVKAHNKKEGKKY  
PsmAF33\_000006700.1 MENKVLWAVFYNLVFLFLLASSKESNRKAYKYLKKEPKLWPLQDSLNESDKFEYTTGGKENPPNFFSSNVKAHNKKEGKKY  
PsmAF34\_000005900.1 MENKVLWAVFYNLVFLFLLASSKESNRKAYKYLKKEPKLWPLQDSLNESDKFEYTTGGKENPPNFFSSNVKAHNKKEGKKY  
PvivaxAM01\_000076800.1 MENKVLWAVFYNLVFLFLLASSKESNRKAYKYLKKEPKLWPLQDSLNESDKFEYTTGGKENPPNFFSSNVKAHNKKEGKKY  
PvivaxAM02\_000474900.1 MENKVLWAVFYNLVFLFLLASSKESNRKAYKYLKKEPKLWPLQDSLNESDKFEYTTGGKENPPNFFSSNVKAHNKKEGKKY  
PVL\_140006600-t42\_1-p1 MENKVLWAVFYNLVFLFLLASSKESNRKAYKYLKKEPKLWPLQDSLNESDKFEYTTGGKENPPNFFSSNVKAHNKKEGKKY

PVX\_121920.1-p1 EQNLSPDNTSFVTVKKNYTRTPSHHAYIRRDNHTNSTNNNQIRNVPKELNPREFLFTPKNQISASLIQTNGPVAPMD  
PVP01\_1402400.1-p1 EQNLSPDNTSFVTVKKNYTRTPSHHAYIRRDNHTNSTNNNQIRNVPKELNPREFLFTPKNQISASLIQTNGPVAPMD  
Psm12302\_000007000.1 EQNLSPDNTSFVTVKKNYTRTPSHHAYIRRDNHTNSTNNNQIRNVPKELNPREFLFTPKNQISASLIQTNGPVAPMD  
Psm13636\_000006300.1 EQNLSPDNTSFVTVKKNYTRTPSHHAYIRRDNHTNSTNNNQIRNVPKELNPREFLFTPKNQISASLIQTNGPVAPMD  
PsmAD002\_000007200.1 EQNLSPDNTSFVTVKKNYTRTPSHHAYIRRDNHTNSTNNNQIRNVPKELNPREFLFTPKNQISASLIQTNGPVAPMD  
PsmAD005\_000448800.1 EQNLSPDNTSFVTVKKNYTRTPSHHAYIRRDNHTNSTNNNQIRNVPKELNPREFLFTPKNQISASLIQTNGPVAPMD  
PsmAF28\_000006200.1 EQNLSPDNTSFVTVKKNYTRTPSHHAYIRRDNHTNSTNNNQIRNVPKELNPREFLFTPKNQISASLIQTNGPVAPMD  
PsmAF33\_000006700.1 EQNLSPDNTSFVTVKKNYTRTPSHHAYIRRDNHTNSTNNNQIRNVPKELNPREFLFTPKNQISASLIQTNGPVAPMD  
PsmAF34\_000005900.1 EQNLSPDNTSFVTVKKNYTRTPSHHAYIRRDNHTNSTNNNQIRNVPKELNPREFLFTPKNQISASLIQTNGPVAPMD  
PvivaxAM01\_000076800.1 EQNLSPDNTSFVTVKKNYTRTPSHHAYIRRDNHTNSTNNNQIRNVPKELNPREFLFTPKNQISASLIQTNGPVAPMD  
PvivaxAM02\_000474900.1 EQNLSPDNTSFVTVKKNYTRTPSHHAYIRRDNHTNSTNNNQIRNVPKELNPREFLFTPKNQISASLIQTNGPVAPMD  
PVL\_140006600-t42\_1-p1 EQNLSPDNTSFVTVKKNYTRTPSHHAYIRRDNHTNSTNNNQIRNVPKELNPREFLFTPKNQISASLIQTNGPVAPMD

PVX\_121920.1-p1 ILRYLDFSNSSGQIISTVYFVYQMNMYFAEIKYYITYHYEAKKNYDEAYNQSVNPLMSSIQIQNSVCPKKALEKTFIV  
PVP01\_1402400.1-p1 ILRYLDFSNSSGQIISTVYFVYQMNMYFAEIKYYITYHYEAKKNYDEAYNQSVNPLMSSIQIQNSVCPKKALEKTFIV  
Psm12302\_000007000.1 ILRYLDFSNSSGQIISTVYFVYQMNMYFAEIKYYITYHYEAKKNYDEAYNQSVNPLMSSIQIQNSVCPKKALEKTFIV  
Psm13636\_000006300.1 ILRYLDFSNSSGQIISTVYFVYQMNMYFAEIKYYITYHYEAKKNYDEAYNQSVNPLMSSIQIQNSVCPKKALEKTFIV  
PsmAD002\_000007200.1 ILRYLDFSNSSGQIISTVYFVYQMNMYFAEIKYYITYHYEAKKNYDEAYNQSVNPLMSSIQIQNSVCPKKALEKTFIV  
PsmAD005\_000448800.1 ILRYLDFSNSSGQIISTVYFVYQMNMYFAEIKYYITYHYEAKKNYDEAYNQSVNPLMSSIQIQNSVCPKKALEKTFIV  
PsmAF28\_000006200.1 ILRYLDFSNSSGQIISTVYFVYQMNMYFAEIKYYITYHYEAKKNYDEAYNQSVNPLMSSIQIQNSVCPKKALEKTFIV  
PsmAF33\_000006700.1 ILRYLDFSNSSGQIISTVYFVYQMNMYFAEIKYYITYHYEAKKNYDEAYNQSVNPLMSSIQIQNSVCPKKALEKTFIV  
PsmAF34\_000005900.1 ILRYLDFSNSSGQIISTVYFVYQMNMYFAEIKYYITYHYEAKKNYDEAYNQSVNPLMSSIQIQNSVCPKKALEKTFIV  
PvivaxAM01\_000076800.1 ILRYLDFSNSSGQIISTVYFVYQMNMYFAEIKYYITYHYEAKKNYDEAYNQSVNPLMSSIQIQNSVCPKKALEKTFIV  
PvivaxAM02\_000474900.1 ILRYLDFSNSSGQIISTVYFVYQMNMYFAEIKYYITYHYEAKKNYDEAYNQSVNPLMSSIQIQNSVCPKKALEKTFIV  
PVL\_140006600-t42\_1-p1 ILRYLDFSNSSGQIISTVYFVYQMNMYFAEIKYYITYHYEAKKNYDEAYNQSVNPLMSSIQIQNSVCPKKALEKTFIV

PVX\_121920.1-p1 LEYPENHNINLSNYEAKHNEYKQLDAYKNCVQANMESYDRMSKFNEKIYSILNSVKCTDACETDYEIMLEIYVERVK  
PVP01\_1402400.1-p1 LEYPENHNINLSNYEAKHNEYKQLDAYKNCVQANMESYDRMSKFNEKIYSILNSVKCTDACETDYEIMLEIYVERVK  
Psm12302\_000007000.1 LEYPENHNINLSNYEAKHNEYKQLDAYKNCVQANMESYDRMSKFNEKIYSILNSVKCTDACETDYEIMLEIYVERVK  
Psm13636\_000006300.1 LEYPENHNINLSNYEAKHNEYKQLDAYKNCVQANMESYDRMSKFNEKIYSILNSVKCTDACETDYEIMLEIYVERVK  
PsmAD002\_000007200.1 LEYPENHNINLSNYEAKHNEYKQLDAYKNCVQANMESYDRMSKFNEKIYSILNSVKCTDACETDYEIMLEIYVERVK  
PsmAD005\_000448800.1 LEYPENHNINLSNYEAKHNEYKQLDAYKNCVQANMESYDRMSKFNEKIYSILNSVKCTDACETDYEIMLEIYVERVK  
PsmAF28\_000006200.1 LEYPENHNINLSNYEAKHNEYKQLDAYKNCVQANMESYDRMSKFNEKIYSILNSVKCTDACETDYEIMLEIYVERVK  
PsmAF33\_000006700.1 LEYPENHNINLSNYEAKHNEYKQLDAYKNCVQANMESYDRMSKFNEKIYSILNSVKCTDACETDYEIMLEIYVERVK  
PsmAF34\_000005900.1 LEYPENHNINLSNYEAKHNEYKQLDAYKNCVQANMESYDRMSKFNEKIYSILNSVKCTDACETDYEIMLEIYVERVK  
PvivaxAM01\_000076800.1 LEYPENHNINLSNYEAKHNEYKQLDAYKNCVQANMESYDRMSKFNEKIYSILNSVKCTDACETDYEIMLEIYVERVK  
PvivaxAM02\_000474900.1 LEYPENHNINLSNYEAKHNEYKQLDAYKNCVQANMESYDRMSKFNEKIYSILNSVKCTDACETDYEIMLEIYVERVK  
PVL\_140006600-t42\_1-p1 LEYPENHNINLSNYEAKHNEYKQLDAYKNCVQANMESYDRMSKFNEKIYSILNSVKCTDACETDYEIMLEIYVERVK

PVX\_121920.1-p1 EVNHNNYVNYLSTLKASLQLGVTLMKVKQIEDNNVTISAINFLQEEMLDIITIGEAHTGKIIHGKENVLKLQNNNIPPQ  
PVP01\_1402400.1-p1 EVNHNNYVNYLSTLKASLQLGVTLMKVKQIEDNNVTISAINFLQEEMLDIITIGEAHTGKIIHGKENVLKLQNNNIPSQ  
Psm12302\_000007000.1 EVNHNNYVNYLSTLKASLQLGVTLMKVKQIEDNNVTISAINFLQEEMLDIITIGEAHTGKIIHGKENVLKLQNNNIPPQ  
Psm13636\_000006300.1 EVNHNNYVNYLSTLKASLQLGVTLMKVKQIEDNNVTISAINFLQEEMLDIITIGEAHTGKIIHGKENVLKLQNNNIPPQ  
PsmAD002\_000007200.1 EVNHNNYVNYLSTLKASLQLGVTLMKVKQIEDNNVTISAINFLQEEMLDIITIGEAHTGKIIHGKENVLKLQNNNIPPQ  
PsmAD005\_000448800.1 EVNHNNYVNYLSTLKASLQLGVTLMKVKQIEDNNVTISAINFLQEEMLDIITIGEAHTGKIIHGKENVLKLQNNNIPPQ  
PsmAF28\_000006200.1 EVNHNNYVNYLSTLKASLQLGVTLMKVKQIEDNNVTISAINFLQEEMLDIITIGEAHTGKIIHGKENVLKLQNNNIPPQ  
PsmAF33\_000006700.1 EVNHNNYVNYLSTLKASLQLGVTLMKVKQIEDNNVTISAINFLQEEMLDIITIGEAHTGKIIHGKENVLKLQNNNIPPQ  
PsmAF34\_000005900.1 EVNHNNYVNYLSTLKASLQLGVTLMKVKQIEDNNVTISAINFLQEEMLDIITIGEAHTGKIIHGKENVLKLQNNNIPPQ  
PvivaxAM01\_000076800.1 EVNHNNYVNYLSTLKASLQLGVTLMKVKQIEDNNVTISAINFLQEEMLDIITIGEAHTGKIIHGKENVLKLQNNNIPSQ  
PvivaxAM02\_000474900.1 EVNHNNYVNYLSTLKASLQLGVTLMKVKQIEDNNVTISAINFLQEEMLDIITIGEAHTGKIIHGKENVLKLQNNNIPSQ  
PVL\_140006600-t42\_1-p1 EVNLNNYVNYLSTLKASLQLGVTLMKVKQIEDNNVTISTINFLQEEMLDIITIGEAHTGKIIHGKENVLKLQKGEIPAE

PVX\_121920.1-p1 VPLSTLKKLYFDSANFYATYKFLKRDTTTTAALKEKGLLANLKNLYTYVSEKIDKNLDSLYFISKSESMSIFEDTF  
PVP01\_1402400.1-p1 VPLSTLKKLYFDSANFYATYKFLKRDTTTTAALKEKGLLANLKNLYTYVSEKIDKNLDSLYFISKSESMSIFEDTF  
Psm12302\_000007000.1 VPLSTLKKLYFDSANFYATYKFLKRDTTTTAALKEKGLLANLKNLYTYVSEKIDKNLDSLYFISKSESMSIFEDTF  
Psm13636\_000006300.1 VPLSTLKKLYFDSANFYATYKFLKRDTTTTAALKEKGLLANLKNLYTYVSEKIDKNLDSLYFISKSESMSIFEDTF  
PsmAD002\_000007200.1 VPLSTLKKLYFDSANFYATYKFLKRDTTTTAALKEKGLLANLKNLYTYVSEKIDKNLDSLYFISKSESMSIFEDTF  
PsmAD005\_000448800.1 VPLSTLKKLYFDSANFYATYKFLKRDTTTTAALKEKGLLANLKNLYTYVSEKIDKNLDSLYFISKSESMSIFEDTF  
PsmAF28\_000006200.1 VPLSTLKKLYFDSANFYATYKFLKRDTTTTAALKEKGLLANLKNLYTYVSEKIDKNLDSLYFISKSESMSIFEDTF  
PsmAF33\_000006700.1 VPLSTLKKLYFDSANFYATYKFLKRDTTTTAALKEKGLLANLKNLYTYVSEKIDKNLDSLYFISKSESMSIFEDTF  
PsmAF34\_000005900.1 VPLSTLKKLYFDSANFYATYKFLKRDTTTTAALKEKGLLANLKNLYTYVSEKIDKNLDSLYFISKSESMSIFEDTF  
PvivaxAM01\_000076800.1 VPLSTLKKLYFDSANFYATYKFLKRDTTTTAALKEKGLLANLKNLYTYVSEKIDKNLDSLYFISKSESMSIFEDTF  
PvivaxAM02\_000474900.1 VPLSTLKKLYFDSANFYATYKFLKRDTTTTAALKEKGLLANLKNLYTYVSEKIDKNLDSLYFISKSESMSIFEDTF  
PVL\_140006600-t42\_1-p1 VPLSTLKKLYFDSANFYATYKFLKRDTTTTAALKEKGLLANLKNLYTYVSEKIDKNLDSLYFISKSESMSIFEDTF







Figure S25 (cont.)

|                        |                                                                                        |
|------------------------|----------------------------------------------------------------------------------------|
| PVX_121920.1-p1        | IQPTELSSQASESTTPELKFSEGEEMKLEILTLSGNTTKLDYYKNMKDAYQSVLSIFKYSHGIDEKQRESQKITESANGS       |
| PVP01_1402400.1-p1     | IQPTELSSQASESTTPELKFSEGEEMKLEILTLSGNTTKLDYYKNMKDAYQSVLSIFKYSHGIDEKQRESQKITESANGS       |
| Psim2302_000007000.1   | -----                                                                                  |
| Psim3636_000006300.1   | -----                                                                                  |
| PsimAD002_000007200.1  | -----                                                                                  |
| PsimAD005_000448800.1  | -----                                                                                  |
| PsimAF28_000006200.1   | -----                                                                                  |
| PsimAF33_000006700.1   | -----                                                                                  |
| PsimAF34_000005900.1   | -----                                                                                  |
| PvivaxAM01_000076800.1 | IQPTELSSQASESTTPELKFSEGEEMKLEILTLSGNTTKLDYYKNMKDAYQSVLSIFKYSHGIDEKQRESQKITESANGS       |
| PvivaxAM02_000474900.1 | IQPTELSSQASESTTPELKFSEGEEMKLEILTLSGNTTKLDYYKNMKDAYQSVLSIFKYSHGIDEKQRESQKITESANGS       |
| PVL_140006600-t42_1-p1 | IQPTELSSQASESTTPELKFSEGEREMKLEILTLSGNTTKLDYYKNMKDAYQSVLSILKYSHGIDEKQRESQKITESANGS      |
|                        |                                                                                        |
| PVX_121920.1-p1        | YLNNKEINEFKGRLNNVKSKQTAISNKIDNATTLHLNLNKIKTDDKNYDTILEKDASEELKRRRDSFNQEMKNTVDGLKL       |
| PVP01_1402400.1-p1     | YLNNKEINEFKGRLNNVKSKQTAISNKIDNATTLHLNLNKIKTDDKNYDTILEKDASEELKRRRDSFNQEIKNNTVDGLKL      |
| Psim2302_000007000.1   | -----                                                                                  |
| Psim3636_000006300.1   | -----                                                                                  |
| PsimAD002_000007200.1  | -----                                                                                  |
| PsimAD005_000448800.1  | -----                                                                                  |
| PsimAF28_000006200.1   | -----                                                                                  |
| PsimAF33_000006700.1   | -----                                                                                  |
| PsimAF34_000005900.1   | -----                                                                                  |
| PvivaxAM01_000076800.1 | YLNNKEINEFKGRLNNVKSKQTAISNKIDNATTLHLNLNKIKTDDKNYDTILEKDASEELKRRRDSFNQEMKNTVDGLKL       |
| PvivaxAM02_000474900.1 | YLNNKEINEFKGRLNNVKSKQTAISNKIDNATTLHLNLNKIKTDDKNYDTILEKDASEELKRRRDSFNQEMKNTVDGLKL       |
| PVL_140006600-t42_1-p1 | YLNNKAININEFKGRLNNVKSKQTAISNKIDNATTLHLNLNKIKTDDKNYDTILEKDASEELKRRRDSFNQEMKNTVDGLKL     |
|                        |                                                                                        |
| PVX_121920.1-p1        | KEIQEKFNEQVKLLQNLQLETKVSTLNVHEGNATETVKKENTAVDAIQAAAMEGIEKDVVEYINYSYDELLKKGQKIQENQRYTS  |
| PVP01_1402400.1-p1     | KEIQEKFNEQVKLLQNLQLETKVSTLNVHEGNATETVKKENTAVDAIQAAAMEGIEKDVVEYINYSYDELLKKGQKIQENQRYTS  |
| Psim2302_000007000.1   | -----                                                                                  |
| Psim3636_000006300.1   | -----                                                                                  |
| PsimAD002_000007200.1  | -----                                                                                  |
| PsimAD005_000448800.1  | -----                                                                                  |
| PsimAF28_000006200.1   | -----                                                                                  |
| PsimAF33_000006700.1   | -----                                                                                  |
| PsimAF34_000005900.1   | -----                                                                                  |
| PvivaxAM01_000076800.1 | KEIQEKFNEQVKLLQNLQLETKVSTLNVHEGNATETVKKENTAVDAIQAAAMEGIEKDVVEYINYSYDELLKKGQKIQENQRYTS  |
| PvivaxAM02_000474900.1 | KEIQEKFNEQVKLLQNLQLETKVSTLNVHEGNATETVKKENTAVDAIQAAAMEGIEKDVVEYINYSYDELLKKGQKIQENQRYTS  |
| PVL_140006600-t42_1-p1 | KEIQEKFNEQVKLLQNLQLETKVSTLNVHEGNVTVETVKKENTAVDAIQAAAMEGIEKDVVEYINYSYDELLKKGQKIQENQRYTS |
|                        |                                                                                        |
| PVX_121920.1-p1        | IRENLTNKIANDSSAINKIKKKAQQYLAYIKNNYNSIYNDGTGLNEYFDTKRLSNHDLTNVQEATRLHIEMSAAVEASEE       |
| PVP01_1402400.1-p1     | IRENLTNKIANDSSAINKIKKKAQYELAYIKNNYNSIYNDGTGLNEYFDTKRLSNHDLTNVQEATRLHIEMSAAVEASEE       |
| Psim2302_000007000.1   | -----                                                                                  |
| Psim3636_000006300.1   | -----                                                                                  |
| PsimAD002_000007200.1  | -----                                                                                  |
| PsimAD005_000448800.1  | -----                                                                                  |
| PsimAF28_000006200.1   | -----                                                                                  |
| PsimAF33_000006700.1   | -----                                                                                  |
| PsimAF34_000005900.1   | -----                                                                                  |
| PvivaxAM01_000076800.1 | IRENLTNKIANDSSAINKIKKKAQQYLAYIKNNYNSIYNDGTGLNEYFDTKRLSNHDLTNVQEATRLHIEMSAAVEASEE       |
| PvivaxAM02_000474900.1 | IRENLTNKIANDSSAINKIKKKAQQYLAYIKNNYNSIYNDGTGLNEYFDTKRLSNHDLTNVQEATRLHIEMSAAVEASEE       |
| PVL_140006600-t42_1-p1 | IRENLTNKIANDSSAINKIKKKAQQYLAYIKNNYNSIYNDIGTLNEYFDIKRLSNHDLTNVQEATRLHIEMSAAVEASEE       |
|                        |                                                                                        |
| PVX_121920.1-p1        | IIADMKNFEITNTEADISALQNSADRLKSLYSLNLRKQKISINQIYKINLIKLEIKTSANKYMDIAKLFNNVLEAQHKE        |
| PVP01_1402400.1-p1     | IIADMKNFEITNTEADISALQNSADRLMSLYSLNLRKQKISINQIYKINLIKLEIKTSANKYMDIAKLFNNVLEAQHKE        |
| Psim2302_000007000.1   | -----                                                                                  |
| Psim3636_000006300.1   | -----                                                                                  |
| PsimAD002_000007200.1  | -----                                                                                  |
| PsimAD005_000448800.1  | -----                                                                                  |
| PsimAF28_000006200.1   | -----                                                                                  |
| PsimAF33_000006700.1   | -----                                                                                  |
| PsimAF34_000005900.1   | -----                                                                                  |
| PvivaxAM01_000076800.1 | IIADMKNFEITNTEADISALQNSADRLKSLYSLNLRKQKISINQIYKINLIKLEIKTSANKYMDIAKLFNNVLEAQHKE        |
| PvivaxAM02_000474900.1 | IIADMKNFEITNTEADISALQNSADRLKSLYSLNLRKQKISINQIYKINLIKLEIKTSANKYMDIAKLFNNVLEAQHKE        |
| PVL_140006600-t42_1-p1 | IIADMKNFEITNTEADISALQNSADRLKSLYSLNLRKQKISINQIYKINLIKLEIKTSANKYMDIAKLFNNVLEAQHKK        |
|                        |                                                                                        |
| PVX_121920.1-p1        | LAQDRSKILQAK-----                                                                      |
| PVP01_1402400.1-p1     | LAQDISKILQAK-----                                                                      |
| Psim2302_000007000.1   | -----                                                                                  |
| Psim3636_000006300.1   | -----                                                                                  |
| PsimAD002_000007200.1  | -----                                                                                  |
| PsimAD005_000448800.1  | -----                                                                                  |
| PsimAF28_000006200.1   | -----                                                                                  |
| PsimAF33_000006700.1   | -----                                                                                  |
| PsimAF34_000005900.1   | -----                                                                                  |
| PvivaxAM01_000076800.1 | LAQDRSKILQAK-----                                                                      |
| PvivaxAM02_000474900.1 | LAQDRSKILQAK-----                                                                      |
| PVL_140006600-t42_1-p1 | LAQDRSKILQVKEKLIINTEKELANLDETITLQSLKKSNELCNSATKNIQDIRELEKENNKEDKKIKIYGEKISHLINRRK      |
